# Determinants of QTL mapping power in the realized Collaborative Cross

Gregory R. Keele<sup>\*,†,‡</sup>, Wesley L. Crouse<sup>\*,†,‡</sup>, Samir N. P. Kelada<sup>‡,§</sup> and William Valdar<sup>‡,\*\*,1</sup>

\*Authors contributed equally, <sup>†</sup>Curriculum in Bioinformatics and Computational Biology, <sup>‡</sup>Department of Genetics, <sup>§</sup>Marsico Lung Institute, <sup>\*\*</sup>and Lineberger Comprehensive Cancer Center, University of North Carolina, Chapel Hill, North Carolina 27599  
ORCID IDs: 0000-0002-1843-7900 (G.R.K.), 0000-0001-5745-4490 (W.L.C.), 0000-0003-2676-9232 (S.N.P.K.), 0000-0002-2419-0430 (W.V.)

**ABSTRACT** The Collaborative Cross (CC) is a mouse genetic reference population whose range of applications includes quantitative trait loci (QTL) mapping. The design of a CC QTL mapping study involves multiple decisions, including which and how many strains to use, and how many replicates per strain to phenotype, all viewed within the context of hypothesized QTL architecture. Until now, these decisions have been informed largely by early power analyses that were based on simulated, hypothetical CC genomes. Now that more than 50 CC strains are available and more than 70 CC genomes have been observed, it is possible to characterize power based on realized CC genomes. We report power analyses based on extensive simulations and examine several key considerations: 1) the number of strains and biological replicates, 2) the QTL effect size, 3) the presence of population structure, and 4) the distribution of functionally distinct alleles among the founder strains at the QTL. We also provide general power estimates to aide in the design of future experiments. All analyses were conducted with our R package, SPARCC (Simulated Power Analysis in the Realized Collaborative Cross), developed for performing either large scale power analyses or those tailored to particular CC experiments.

**KEYWORDS** recombinant inbred lines, haplotype association, allelic series, multiparental population, MPP, quantitative trait, complex trait

## 1 Introduction

2 The Collaborative Cross (CC) is a multiparental population  
3 (MPP) recombinant inbred (RI) strain panel of laboratory mice  
4 derived from eight inbred founder strains (letter abbrevia-  
5 tion in parentheses): A/J (A), C57BL/6J (B), 129S1/SvImJ (C),  
6 NOD/ShiLtJ (D), NZO/H1LtJ (E), CAST/EiJ (F), PWK/PhJ (G),  
7 and WSB/EiJ (H) (Threadgill *et al.* 2002; Churchill *et al.* 2004;  
8 Chesler *et al.* 2008; Threadgill and Churchill 2012). This set of  
9 founder strains represents three subspecies of the house mouse  
10 *Mus musculus* (Yang *et al.* 2011) and, in large part due to the inclu-  
11 sion of three wild-derived founders (F-H), imbues the CC panel  
12 with far greater genetic variation than previous RI panels de-  
13 rived solely from pairs of classical inbred strains. As an RI panel,  
14 the CC thus provides a diverse set of reproducible genomes and  
15 represents a powerful tool for genetic analysis (Collaborative

16 Cross Consortium 2012; Srivastava *et al.* 2017). Indeed, although  
17 the CC RI panel has only become available in the last six years  
18 (Welsh *et al.* 2012), it has already yielded new insights into hu-  
19 man disease and basic mouse biology (Shusterman *et al.* 2013;  
20 Rogala *et al.* 2014; Rasmussen *et al.* 2014; Lorè *et al.* 2015; Levy  
21 *et al.* 2015; Gralinski *et al.* 2015; Venkatratnam *et al.* 2017; Orgel  
22 *et al.* 2019; Molenhuis *et al.* 2018).

23 As originally envisaged, a key use of the CC was as a resource  
24 for QTL mapping (Threadgill *et al.* 2002; Churchill *et al.* 2004). In  
25 theory, its broad genetic diversity makes it ideal for this purpose,  
26 and its replicability permits the mapping of phenotypes such as  
27 drug-response that are otherwise hard to measure in outbreds  
28 (Mosedale *et al.* 2017). Its utility for QTL mapping in practice  
29 was also predicted by studies in the incipient CC lines (pre-CC)  
30 (Aylor *et al.* 2011; Durrant *et al.* 2011; Philip *et al.* 2011; Mathes  
31 *et al.* 2011; Kelada *et al.* 2012; Ferris *et al.* 2013; Ram *et al.* 2014;  
32 Rutledge *et al.* 2014; Kelada 2016; Donoghue *et al.* 2017; Phillippi  
33 *et al.* 2014)

34 Nonetheless, QTL mapping power depends in part on the  
35 number of strains available, and the number strains available  
36 in the CC is, and will remain, far less than the 1,000 proposed  
37 in Churchill *et al.* (2004): At the time of this work, mice were

Manuscript compiled: Sunday 17<sup>th</sup> March, 2019

<sup>1</sup>Corresponding author: 120 Mason Farm Rd., Genetic Medicine Bldg., Suite 5022,  
Campus Box 7264, University of North Carolina, Chapel Hill, NC 27599.

E-mail: william.valdar@unc.edu

available for 59 CC strains from the UNC Systems Genetics Core, with a subset from these 59 and an additional 11 expected to be offered through the Jackson Laboratory (JAX), a total of 70 CC strains potentially.

A reduction in strain numbers as a function of allelic incompatibilities between subspecies (Shorter *et al.* 2017) was expected, and winnowed the number of resulting CC strains down to 50-70. Although smaller than originally intended, this population size reflects the biological and financial realities of maintaining a sustainable mammalian genome reference population. [Whereas cost grows proportional to the number of strains, demand does not, and a much larger number of strains would threaten the economic viability of the operation (F. Pardo-Manuel de Villena, *pers. comm.*.)] Nonetheless, subsets of the available CC strains have already been used to map QTL, as evidenced by a growing list of studies (Vered *et al.* 2014; Mosedale *et al.* 2017; Graham *et al.* 2017). Beyond these successes, however, it is unclear how much the reduction has affected the ability to map QTL in the CC in general.

The initially proposed figure of 1,000 CC strains in Churchill *et al.* (2004) was more formally justified in Valdar *et al.* (2006a) as being necessary to provide enough power both to map single QTL and for robust, genome-wide detection of epistasis. That estimate was based on simulations involving larger numbers (500-1,000) of hypothetical CC genomes. Those simulations, performed before any CC strains existed and with the goal of guiding the CC's design, had a broad scope, exploring the effect of varying strain numbers, alternative mapping approaches [association of single nucleotide polymorphisms (SNPs) vs association of inferred haplotypes], and alternative breeding strategies. As such, the power estimates that were reported do not reflect the number of CC strains now available, nor their actual, realized founder mosaic genomes. An updated, more focused power analysis that both exploits and works within the constraints of the realized genomes is therefore timely.

Power analyses have been performed previously for a number of RI panels. For biparental RIs, they have been performed analytically in plants (*e.g.*, Kaepler 1997), animals [*e.g.*, the BXD lines in mice (Belknap *et al.* 1996; Peirce *et al.* 2004)], and in general (Cowen 1988; Soller and Beckmann 1990; Knapp and Bridges 1990), as well as through simulation (Falke and Frisch 2011; Takuno *et al.* 2012). For MPP RIs, they have most often been reported as those resources are introduced to the community. This includes, in plants: *Arabidopsis* (Kover *et al.* 2009; Klasen *et al.* 2012), nested association mapping (NAM) populations (Li *et al.* 2011) in maize (Yu *et al.* 2008) and sorghum (Bouchet *et al.* 2017), and multigenerational advanced intercross (MAGIC) populations of rice (Yamamoto *et al.* 2014) and maize (Dell'Acqua *et al.* 2015). In animals, other than aforementioned prospective study of Valdar *et al.* (2006a): Noble *et al.* (2017) assessed mapping power of SNP association while introducing a 507-strain nematode resource, the *Caenorhabditis elegans* Multiparental Experimental Evolution (CeMEE) panel; and King *et al.* (2012) estimated haplotype-based association power while introducing the *Drosophila* Synthetic Population Resource (DSPR), a fly panel with more than 1,600 lines. In a follow-up DSPR power analysis, King and Long (2017) compared the DSPR with the related *Drosophila* Genetic Reference Panel (DGRP) (Mackay *et al.* 2012). They illustrated how QTL effect size differs between a population whose allele frequencies are balanced (DSPR) vs one whose allele frequencies are less balanced (DGRP) and explored implications for cross-population validation; they also compared

mapping power for bi-allelic QTL, based on single SNPs, and multi-allelic QTL constructed from actual adjacent SNPs within genes.

Here we examine related topics on QTL mapping power in the realized CC, including: 1) how power is affected by the number of strains and replicates; 2) how it is affected by the number of functional alleles and their distributions among the founders; and 3) how the QTL effect size is specific to a particular population or sample and how that influences a power estimate's interpretation.

To allow researchers to repeat our analyses, but tailored to their own specific requirements or with updated CC genome lists, we provide an R package SPARCC (Simulated Power Analysis of the Realized Collaborative Cross), a tool that evaluates the power to map QTL by performing efficient haplotype regression-based association analysis of simulated QTL using the currently available CC genomes. SPARCC is highly flexible, allowing QTL to be simulated with any possible allele-to-founder pattern and scaled with respect to different reference populations. As a reusable resource, researchers could estimate power calculations based on the CC strains available to them and potentially incorporate prior knowledge about the genetic architecture of the likely QTL or the phenotype as whole.

## Methods

Our power calculations are based on three main processes:

1. Simulation of CC data, including selection of CC strains from a fixed set of realized CC genomes, and QTL location, and simulation of phenotypes.
2. QTL mapping, including determination of significance thresholds.
3. Evaluation of QTL detection accuracy, power and false positive rate (FPR).

These are described in detail below, after a description of the genomic data that serves as the basis for the simulations.

### Data on realized CC genomes

**CC strains.** Genome data was obtained for a set of 72 CC strains (listed in **Appendix C**) available at the time of writing from <http://csbio.unc.edu/CCstatus/index.py?run=FounderProbs>. Genome data was in the form of founder haplotype mosaics (see below) for each strain, this based on genotype data from the MegaMUGA genotyping platform (Morgan *et al.* 2016) applied to composites of multiple mice per strain. Since genotyping, some of the 72 strains have become extinct, and more may do so in the future (Darla Miller *pers. comm.*), although it is also possible that more may be added. At the time of writing, however, these were all genomes that had been observed by workers at UNC.

Of the 72 CC strains used in the simulations, it is planned that 54 will be maintained and distributed by The UNC Systems Genetics Core, along with another 5 whose genome data were not available in time for this study (see **Discussion**) to give a UNC total of 59 strains (listed in **Appendix C**). A subset of the UNC 59 will also eventually be maintained by The Jackson Laboratory, which will also potentially maintain 11 of the 72 not among the UNC 59.

The 72 strains used in the simulations included two that were more closely related than others: CC051 and CC059. These strains, which are among the UNC 59, were derived from the

157 same breeding funnel; the number of independent strains avail- 209  
 158 able from UNC is thus arguably 58. This relatedness, though not 210  
 159 explicitly modeled in the simulations, is nonetheless marked in 211  
 160 the figures, which include an indicator denoting 58 as a currently 212  
 161 realistic maximum for strain number in CC studies. 213

162 **Reduced dataset of haplotype mosaics.** The genomes of the  
 163 CC, as with other MPPs, can be represented by inferred mosaics  
 164 of the original founder haplotypes (Mott *et al.* 2000). Founder  
 165 haplotype mosaics were inferred previously by the UNC Sys-  
 166 tems Genetics Core ([http://csbio.unc.edu/CCstatus/index.py?run=](http://csbio.unc.edu/CCstatus/index.py?run=FounderProbs)  
 167 [FounderProbs](http://csbio.unc.edu/CCstatus/index.py?run=FounderProbs)) using the hidden Markov model (HMM) of Fu  
 168 *et al.* (2012) applied to genotype calls from MegaMUGA, a geno-  
 169 typing platform providing data on 77,800 SNP markers (Morgan  
 170 *et al.* 2016). The HMM inference provides a vector of 36 diplo-  
 171 type probabilities for each CC strain for each of 77,551 loci (each  
 172 defined as the interval between adjacent, usable SNPs) across the  
 173 genome. Rather than using all of the available data for our simu-  
 174 lations, we used a reduced version: since adjacent loci often have  
 175 almost identical descent, mapping using all loci is both compu-  
 176 tationally expensive and—at least for the purposes of the power  
 177 analysis—largely redundant. Thus, prior to analysis the original  
 178 dataset was reduced by averaging adjacent genomic intervals  
 179 whose diplotype probabilities were highly similar. Specifically,  
 180 adjacent genomic intervals were averaged if the maximum L2  
 181 norm between the probability vectors of all individuals is less  
 182 than 10% of the maximum possible L2 norm ( $\sqrt{2}$ ); this reduced  
 183 the file storage from 610 MB to 288 MB, and the genome from  
 184 77,551 to 17,900 intervals (76.9% reduction in positions to be  
 185 evaluated in a scan).

### 186 Phenotype simulation

187 Phenotypes for CC strains were simulated based on effects from  
 188 a single QTL, plus effects of polygenic background (“strain ef-  
 189 fects”), and noise. Within our simulation framework, we speci-  
 190 fied: 1) the QTL location, which randomly was sampled from  
 191 the genome; 2) the sample size in terms of both strains and  
 192 replicates; 3) how the eight possible haplotypes at that location  
 193 are grouped into eight or fewer functional alleles (the “allelic  
 194 series”; see below); and 4) how those alleles, along with strain  
 195 information, are used to generate phenotype values (see below).

**Underlying phenotype model.** Simulated phenotypes were gen-  
 erated according to the following linear mixed model. For  
 given QTL with  $m \leq 8$  functional alleles, phenotype values  
 $\mathbf{y} = \{y_i\}_{i=1}^N$  for  $N$  individuals in  $n \leq N$  strains were generated  
 so that

$$\mathbf{y} = \mathbf{1}\mu + \underbrace{\mathbf{Z}\mathbf{X}\boldsymbol{\beta}}_{\text{QTL effect}} + \underbrace{\mathbf{Z}\mathbf{u}}_{\text{Strain effect}} + \underbrace{\boldsymbol{\varepsilon}}_{\text{Noise}}, \quad (1)$$

196 where  $\mathbf{1}$  is an  $N$ -vector of 1’s,  $\mu$  is an intercept,  $\mathbf{Z}$  is an  $N \times n$   
 197 incidence matrix mapping individuals to strains,  $\mathbf{X}$  is an  $n \times m$   
 198 allele dosage matrix mapping strains to their estimated dosage  
 199 of each of the  $m$  alleles,  $\boldsymbol{\beta}$  is an  $m$ -vector of allele effects,  $\mathbf{u}$  is an  
 200  $n$ -vector of strain effects (representing polygenic background  
 201 variation), and  $\boldsymbol{\varepsilon}$  is an  $N$ -vector of unstructured, residual error.  
 202 The parameter vectors  $\boldsymbol{\beta}$ ,  $\mathbf{u}$  and  $\boldsymbol{\varepsilon}$  were each generated as being  
 203 equivalent to independent normal variates rescaled to have spec-  
 204 ific variances: the strain effects  $\mathbf{u}$  and residual  $\boldsymbol{\varepsilon}$  were rescaled  
 205 to have population (rather than sample) variances  $h_{\text{strain}}^2$  and  $\sigma^2$   
 206 respectively; the allele effects  $\boldsymbol{\beta}$  were rescaled so that the QTL  
 207 contributes a variance  $h_{\text{QTL}}^2$ , with this latter rescaling performed  
 208 in one of three distinct ways (described later).

The relative contributions of the QTL, polygenic background,  
 and noise were thus controlled through three parameters: the  
 QTL effect size,  $h_{\text{QTL}}^2$ , the strain effect size,  $h_{\text{strain}}^2$ , and the resid-  
 ual variance  $\sigma^2$ . By convention, these were specified as fractions  
 summing to exactly 1.

The allele dosage matrix  $\mathbf{X}$  was generated by collapsing func-  
 tionally equivalent haplotypes according to a specified allelic  
 series. Let  $\mathbf{D}$  be an  $n \times 36$  incidence matrix describing the haplo-  
 type pair (diplotype) state of of each CC strain at the designated  
 QTL, with columns corresponding to AA, ..., HH, AB, ..., GH,  
 such that, for example,  $\{D\}_{3,1} = 1$  implies CC strain 3 has  
 diplotype AA. Then

$$\mathbf{X} = \mathbf{D}\mathbf{A}\mathbf{M}, \quad (2)$$

214 where  $\mathbf{A}$  is an  $36 \times 8$  additive model matrix that maps diplotype  
 215 state to haplotype dosage (*e.g.*, diplotype AA equals 2 doses of  
 216 A), and  $\mathbf{M}$  is an  $8 \times m$  “merge matrix” [after Yalcin *et al.* (2005)]  
 217 that encodes the allelic series, mapping the 8 haplotypes to  $m$  al-  
 218 leles, such that if haplotypes A and B were both in the functional  
 219 group “allele 1”, then diplotype AB in  $\mathbf{D}$  would correspond to 2  
 220 doses of allele 1 in  $\mathbf{X}$  (see examples in **Appendix D**).

221 **QTL allelic series.** The specification of an allelic series, rather  
 222 than assuming all haplotype effects are distinct, acknowledges  
 223 that for many QTL we would expect the same functional allele  
 224 to be carried by multiple founder haplotypes. For our main set  
 225 of simulations, the allelic series was randomly sampled from all  
 226 possible configurations (examples in **Figure 1**); in a smaller, more  
 227 focused investigation of the effects of allele frequency imbalance,  
 228 we sampled from all possible configurations of bi-alleles.

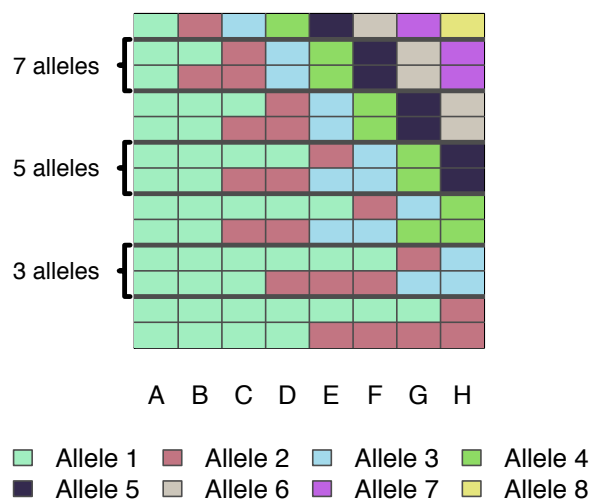

**Figure 1** Example allelic series with differing numbers of func-  
 tional alleles. Each row is an allelic series, each column of the  
 grid is a CC founder, and colors correspond to functional allele.  
 Two examples of allelic series are provided for each number of  
 functional alleles: a balanced series and an imbalanced series.  
 The entire space of allelic series are not shown here; however, the  
 full space of series with two alleles is shown in **Figure 9A**.

229 **Alternative definitions of QTL effect size: B and DAMB.** The  
 230 QTL effect size ( $h_{\text{QTL}}^2$ ) is a critical determinant of mapping  
 231 power; yet its precise definition and its corresponding inter-  
 232 pretation often varies between studies and according to what

question is being asked. We used two alternative definitions, “B” and “DAMB”, described below. These alternatives acknowledge that the proportion of variance explained by a particular QTL, and thus the power to detect that QTL, is not determined solely by  $h_{\text{QTL}}^2$ , but rather depends on several additional factors, namely: the variance of the finite sample of allele effects  $\beta$ ; the allelic series configuration  $\mathbf{M}$ ; and the particular set of CC strains and their locus diplotypes  $\mathbf{D}$ .

Definition B scales the allele effects so that  $h_{\text{QTL}}^2 = V(2\beta)$ , where  $V()$  denotes the population variance (rather than the sample variance). The QTL effect size is interpretable as the variance that would be explained by the QTL in a theoretical population that is balanced with respect to the functional alleles. As such, the proportion of variance explained by the QTL in the mapping population will deviate from  $h_{\text{QTL}}^2$  due to imbalance in both  $\mathbf{M}$  and  $\mathbf{D}$ . Conversely, for a given  $h_{\text{QTL}}^2$ , the allelic values at a QTL will be constant across populations. (Note: the 2 multiplier ensures proper scaling since  $\mathbf{X}$  from Eq 2 includes dosages of founder haplotypes at the QTL, ranging from 0 to 2.)

Definition DAMB scales the QTL effect so that  $h_{\text{QTL}}^2 = V(\mathbf{DAM}\beta)$ . The QTL effect size is exactly the variance explained by the QTL in the mapping population, essentially the  $R^2$ . As such, it depends on both  $\mathbf{M}$  and  $\mathbf{D}$ . Correspondingly, for a given  $h_{\text{QTL}}^2$ , the allelic values will adjust depending on which population they are in. [In the **Supplement**, for completeness, we also describe a further, intermediate option, Definition MB, where  $h_{\text{QTL}}^2 = V(2\mathbf{M}\beta)$ , corresponding to balanced founder contributions.]

The earlier power study of Valdar *et al.* (2006a), which considered only bi-allelic QTL, defined effect size in a manner comparable to Definition B.

**Averaging over strains and causal loci.** The previous subsections described simulation of a single phenotype conditional on a set of strains and a causal genomic locus. For each of  $S$  simulations,  $s = 1, \dots, S$ , we averaged over these variables by uniformly sampling 1) the set of strains included in the experiment (for a specified number of strains), 2) the causal locus underlying the QTL, and 3) the allelic series (for a specified number of functional alleles). This was intended to produce power estimates that take into account many sources of uncertainty and are thus broadly applicable.

#### QTL detection and power estimation

**QTL mapping model.** QTL mapping of the simulated data was performed using a variant of Haley-Knott (HK) regression (Haley and Knott 1992; Martínez and Curnow 1992) that is commonly used in MPP studies (Mott *et al.* 2000; Liu *et al.* 2010; Fu *et al.* 2012; Gatti *et al.* 2014; Zheng *et al.* 2015) whereby association is tested between the phenotype and the local haplotype state, the latter having been inferred probabilistically from genotype (or sequence data) and represented as a set of diplotype probabilities or, in the case of an additive model, a set of haplotype dosages then used as predictors in a linear regression. Specifically, we used HK regression on the strain means (Valdar *et al.* 2006a; Zou *et al.* 2006) via the linear model

$$\bar{\mathbf{y}}^{(s)} = \mathbf{1}\mu + \mathbf{P}\mathbf{A}\beta + \epsilon, \quad (3)$$

where  $\bar{\mathbf{y}}^{(s)}$  is the  $s^{\text{th}}$  simulated  $n$ -vector of strain means,  $\mathbf{P}$  is an  $n \times 36$  matrix of inferred diplotype probabilities for the sampled CC genomes at the QTL [i.e.,  $\mathbf{P} = p(\mathbf{D}|\text{genotype data})$ ]; see Zhang *et al.* (2014)], and  $\epsilon$  is the  $n$ -vector of residual error on

the means, distributed as  $\epsilon \sim N(\mathbf{0}, \mathbf{I}(h_{\text{strain}}^2 + \sigma^2/r))$ . The above implies an eight-allele model (cf Eq 1 with  $\mathbf{M} = \mathbf{I}$ ). Although this could lead to reduced power when there are fewer functional alleles, particularly at loci in which the functional alleles are not well represented, it is most common in practice, in accordance with the fact that the allelic series of an unmapped QTL would typically be unknown in advance [e.g., Mott *et al.* (2000); Valdar *et al.* (2006a,b); Svenson *et al.* (2012); Gatti *et al.* (2014)]. Additional factors that might contribute to variation in an experiment, such as covariates or batch effects, are neither simulated nor modeled; it is assumed that such factors would be adequately accounted for by, for instance, addition of suitable covariates, pre-processing (e.g., residualizing) of phenotype values or similar, and ultimately lead to a more-or-less equivalent analysis to that described here. The fit of Eq 3 was compared with that of an intercept-only null model via an F-test, and produced a p-value, reported as its negative base 10 logarithm, the  $\log P$ . This procedure was performed for all loci across the genome, resulting in a genome scan for  $\mathbf{y}^{(s)}$ .

#### Genome-wide significance thresholds and QTL detection.

Genome-wide significance thresholds were determined empirically by permutation. The CC panel is a balanced population with respect to founder genomic contributions and, by design, has minimal population structure. These features support the assumption of exchangeability among strain genomes: that under a null model in which the genetic contribution to the phenotype is entirely driven by infinitesimal (polygenic) effects, all permutations of the strain labels (or equivalently, of the strain means vector  $\mathbf{y}^{(s)}$ ) are equally likely to produce a given configuration of  $\mathbf{y}^{(s)}$ . Permutation of the strain means,  $\mathbf{y}^{(s)}$ , was therefore used to find the  $\log P$  critical value controlling genome-wide type I error rate (GWER) (Doerge and Churchill 1996). Briefly, we sampled 100 permutations and perform genome scans for each; this was done efficiently using a standard matrix decomposition approach (**Appendix A**). The maximum  $\log P$ s per genome scan and simulation  $s$  were then recorded, and these are fitted to a generalized extreme value distribution (GEV) (Dudbridge and Koeleman 2004; Valdar *et al.* 2006a) using R package *evir* (Pfaff and McNeil 2018). The upper  $\alpha = 0.05$  quantile of this fitted GEV was then taken as the  $\alpha$ -level significance threshold,  $T_{\alpha}^{(s)}$ . If the maximum observed  $\log P$  for  $\mathbf{y}^{(s)}$  in the region of the simulated QTL exceeded  $T_{\alpha}^{(s)}$ , then the corresponding locus was considered to be a (positively) detected QTL (see immediately below).

**Performance evaluation.** For a given simulation, we declared a true positive if the detected QTL was within  $\pm 5\text{Mb}$  of the true (simulated) QTL. The 5Mb window size was used to approximate a QTL support interval, which is partly a function of linkage disequilibrium (LD) in the CC. (LD has been characterized in the CC previously but not summarized with a single point estimate (Collaborative Cross Consortium 2012); our choice of 5Mb is therefore an approximation, but we find that it only marginally increased mapping power relative to using smaller window widths.) A false positive was declared if one or more QTL were detected on chromosomes other than the chromosome harboring the simulated QTL. Simulations in which a QTL was detected on the correct chromosome but outside the 5Mb window were disregarded; although this was potentially wasteful of data and biased FPR slightly downward due to loss of false positives on the chromosome with the simulated QTL,

339 it avoided the need for arbitrary rules to handle edge cases in  
340 which it was ambiguous whether the simulated signal had been  
341 detected or not. Power for a given simulation setting was then  
342 defined as the proportion of true positives among all simulations  
343 at that setting, and the FPR was defined as the proportion of  
344 false positives.

345 As a measurement of mapping resolution, for true positive  
346 detection, we recorded the mean and the 95% quantile of the  
347 genomic distance from the true QTL. Given our criterion for  
348 calling true positives, the maximum distance was necessarily  
349 5Mb, and experimental settings that correspond to low power  
350 would be expected to have fewer data points, yielding estimates  
351 that are unstable. In order to obtain more stable estimates, we  
352 used a regularization procedure, estimating the mean distance  
353 and 95% quantiles as weighted averages of the observed values  
354 and prior pseudo-observations. Specifically, for an arbitrarily  
355 small but detected true positive QTL, it is reasonable to expect  
356 the peak signal to be distributed uniformly within the  $\pm 5$ Mb  
357 window. This implies a mean location error of 2.5Mb and a  
358 95% quantile of 4.75Mb. Thus, when calculating the regularized  
359 mean location error we assumed 10 prior pseudo-observations  
360 of 2.5Mb, and when calculating the regularized 95% quantile we  
361 assume 10 prior pseudo-observations of 4.75Mb. This number  
362 of pseudo-observations represents 1% of the maximum number  
363 of possible data points.

### 364 **Overview of the simulations**

365 **Simulation settings.** Simulations for all combinations of the fol-  
366 lowing parameter settings:

- 367 • Number of strains: [(10-70 by 5), 72]
- 368 • QTL effect size (%): [1, (5-95 by 5)]
- 369 • Number of functional alleles: [2, 3, 8]

The number of observations per strain were fixed at  $r = 1$  and  
the background strain effect size was fixed at  $h_{\text{strain}}^2 = 0\%$  with  
the understanding that results from these simulations provide  
information on other numbers of replicates and strain effect  
sizes implicitly. Specifically, a simulated mapping experiment  
on strain means that assumes  $r$  replicates, strain effect  $h_{\text{strain}}^2$ ,  
and QTL effect size  $h_{\text{QTL}}^2$  is equivalent to a single-observation  
mapping experiment with no strain effect and QTL effect size  
 $\bar{h}_{\text{QTL}}^2$ , where

$$\bar{h}_{\text{QTL}}^2 = \frac{h_{\text{QTL}}^2}{h_{\text{QTL}}^2 + h_{\text{strain}}^2 + \sigma^2/r} \quad (4)$$

370 [Valdar *et al.* (2006a), after Soller and Beckmann (1990); Knapp  
371 and Bridges (1990); Belknap (1998)]. For example, a mapping  
372 experiment on strain means with QTL effect size  $h_{\text{QTL}}^2 = 0.3$ ,  
373  $h_{\text{strain}}^2 = 0.4$ ,  $\sigma^2 = 0.3$ , and  $r = 10$ , is equivalent to our simula-  
374 tion of a single-observation with no strain effect but QTL effect  
375 size  $\bar{h}_{\text{QTL}}^2 \approx 0.41$  (**Supplement**).

376 We conducted  $s = 1,000$  simulation trials per setting. CC  
377 strains and the position of the QTL were sampled for each simu-  
378 lation, providing estimates of power that are effectively aver-  
379 aged over the CC population. We ran these settings for QTL  
380 effect sizes specified with respect to the observed mapping pop-  
381 ulation (Definition DAMB) and a theoretical population that is  
382 balanced in terms of the functional alleles (Definition B). Con-  
383 fidence intervals for power were calculated based on Jeffreys  
384 interval (Brown *et al.* 2001) for a binomial proportion. A descrip-  
385 tion of the computing environment and run-times are provided  
386 in **Appendix B**.

### 387 **Examining FPR when accounting for non-exchangeability of** 388 **CC strain genomes**

389 In the simulations and mapping procedures described above,  
390 strain effects are modeled under the assumption that all CC  
391 strains are (at least approximately) equally related. That is, the  
392 effects  $\mathbf{u} = u_1, \dots, u_{72}$  in Eq 1 are simulated as  $\mathbf{u} \sim N(\mathbf{0}, \mathbf{I}h_{\text{strain}}^2)$   
393 such that any permutation of the values is equally likely (the  
394 effects are exchangeable), and this same assumption is made  
395 in both the mapping model of Eq 3 and the permutation-based  
396 estimation of significance thresholds.

An assumption of equal relatedness among CC strains is com-  
monplace: it is suggested by the exchangeable random funnel  
design used in the CC, is supported by the results of Valdar *et al.*  
(2006a), and has been made in every CC or pre-CC mapping  
analysis to our knowledge. Making this assumption simplifies  
QTL mapping analysis by obviating the need for an explicit mod-  
eling of genomic similarity [as in, *e.g.*, Kang *et al.* (2008)], since,  
when those similarities are approximately equal and the analysis  
is performed on strain means, the strain effects are absorbed into  
the residual error.

Nonetheless, CC strains are equally related only in expecta-  
tion. Much like the "equal" relatedness of siblings, realized  
relatedness will depart from expectation due to chance at the  
point of mixing, and, in the case of the CC, due to selection  
[*e.g.*, arising from male sterility (Shorter *et al.* 2017)] and ge-  
netic drift during inbreeding [as reflected in unequal founder  
contributions by Srivastava *et al.* (2017)]. This combination of  
stochastic forces can produce unequal relatedness, correlated  
effects among strains, and population structure, at least at some  
level.

To quantify population structure in the realized CC, we com-  
pared the eigenvalues of the realized genetic relationship matrix  
 $\mathbf{K}$ , calculated from the founder mosaic probabilities [after Gatti  
*et al.* (2014)], with those from an idealized  $\mathbf{K}$  that reflects equal  
relatedness of the CC strains, whose off-diagonal elements were  
set to the mean value observed for the off-diagonal elements in  
the realized  $\mathbf{K}$ . We observed that slightly fewer principal compo-  
nents are required to explain 95% of the variation in the realized  
 $\mathbf{K}$  than are required for the balanced  $\mathbf{K}$  (64 vs 68 components,  
respectively; **Figure S5A**). This reduction was attenuated with  
the omission of CC059, one of the two cousin strains, but not  
completely (64 vs 67 components; **Figure S5B**). This suggested  
that the realized CC strains have mild population structure.

To evaluate to what degree the population structure in the  
realized CC genomes could inflate FPR when mapping using an  
analytic model and threshold procedure that ignores it (*i.e.*, that  
assumes exchangeability), we performed an additional set of  
null simulations in which strain effects were generated according  
to additive infinitesimal model (Lynch and Walsh 1998) based on  
the actual genomic similarities. Specifically, we set  $h_{\text{QTL}}^2 = 0$  and  
 $\mathbf{u} \sim N(\mathbf{0}, \mathbf{K}h_{\text{strain}}^2)$  but left our mapping protocol unchanged. We  
conducted 10,000 such null simulations with  $r=1$  for each setting  
of strain effect size (%): [0-100 by 20]. These simulations were  
performed using either all 72 founder strains or 71 strains with  
the omission of CC059, one of the two highly-related cousin  
strains. A false positive was declared if any QTL were detected  
based on the permutation-based significance threshold.

### 444 **Measuring the Beavis effect**

445 The "Beavis effect" (Beavis 1994) refers to an upward bias in  
446 estimated effect sizes for detected QTL. This phenomenon, also  
447 known as the "winner's curse" (Zollner and Pritchard 2007),

448 arises because the data used for effect estimation has already  
449 been substantially selected during QTL discovery; the resulting  
450 (post-selection) estimates are thus inflated due to ascertainment  
451 bias. The Beavis effect was evaluated theoretically in Xu (2003)  
452 and found to be most pronounced in studies of smaller sample  
453 size ( $n < 100$ ), suggesting that it could be a significant feature of  
454 CC mapping studies.

455 To assess the extent of the Beavis effect in CC map-  
456 ping experiments, we performed simulations ( $s = 1,000$ )  
457 mapping a bi-allelic QTL, with one replicate ( $r = 1$ ) and  
458 zero background strain effect ( $h^2_{\text{strain}} = 0$ ) for all combina-  
459 tions of simulated QTL effect size under Definition DAMB  
460  $h^2_{\text{QTL}} \in \{0.2, 0.3, 0.4, 0.5, 0.6, 0.7\}$  and numbers of strains  $n \in$   
461  $\{40, 50, 60, 72\}$ . If an association was detected within the 10Mb  
462 window (using permutation-based thresholds as above), then  
463 we recorded the QTL effect size as the  $R^2$  of the model fit at the  
464 peak locus (which may or may not be the locus at which the QTL  
465 was simulated).

#### 466 **Availability of data and software**

467 **R package.** All analyses were conducted in the statistical pro-  
468 gramming language R (R Core Team 2018). SPARCC is available  
469 as an R package on GitHub at <https://github.com/gkeele/sparcc>.  
470 Specific arguments that control the phenotype simulations, the  
471 strains used, genomic position of simulated QTL, and allelic  
472 series, are listed in the **Supplement**. A static version of SPARCC  
473 is also provided there (File S2).

474 Also included within the SPARCC R package are several re-  
475 sults datasets. These include data tables of power summaries  
476 from our simulations, as well as table summaries from simula-  
477 tions of a bi-allelic QTL that is balanced in the founders, max-  
478 imally unbalanced in the founders, and the distance between  
479 detected and simulated QTL. Further details are provided in File  
480 S1 of the **Supplement**, an account of all the supplemental files.  
481 These files are available at figshare, including data, and scripts  
482 to run the analysis and produce the figures. File S3 contains the  
483 founder haplotype mosaics required for the SPARCC package.  
484 Files S4, S5, and S6 can be used to perform the large-scale power  
485 analysis. File S7 describes options in the SPARCC package, and  
486 also provides two simple tutorials. File S8 produces the figures  
487 in this paper and **Supplement**. File S9 is the supplemental tables  
488 and figures.

489 **CC strains.** The 72 CC strains with available data that were in-  
490 cluded in the simulations are described in **Appendix C**. Founder  
491 diplotype probabilities for each CC strain are available on the  
492 CC resource website ([http://csbio.unc.edu/CCstatus/index.py?run=](http://csbio.unc.edu/CCstatus/index.py?run=FounderProbs)  
493 [FounderProbs](http://csbio.unc.edu/CCstatus/index.py?run=FounderProbs)). We used probabilities corresponding to build 37  
494 (mm9) of the mouse genome, though build 38 (mm10) is also  
495 available at the same website.

496 We store the founder haplotype data in a directory structure  
497 that SPARCC is designed to use, and was initially established  
498 by the HAPPY software package (Mott *et al.* 2000). The reduced  
499 data are available on GitHub at [https://github.com/gkeele/sparcc\\_](https://github.com/gkeele/sparcc_cache)  
500 [cache](https://github.com/gkeele/sparcc_cache).

## 501 **Results**

502 Power simulations were performed for varying numbers of  
503 strains, replicates and functional alleles, and for a ladder of  
504 QTL effect sizes. QTL effect size was defined in two ways: as  
505 the variance explained in a hypothetical populations that is bal-  
506 anced with respect to the alleles (Definition B; see **Methods**),

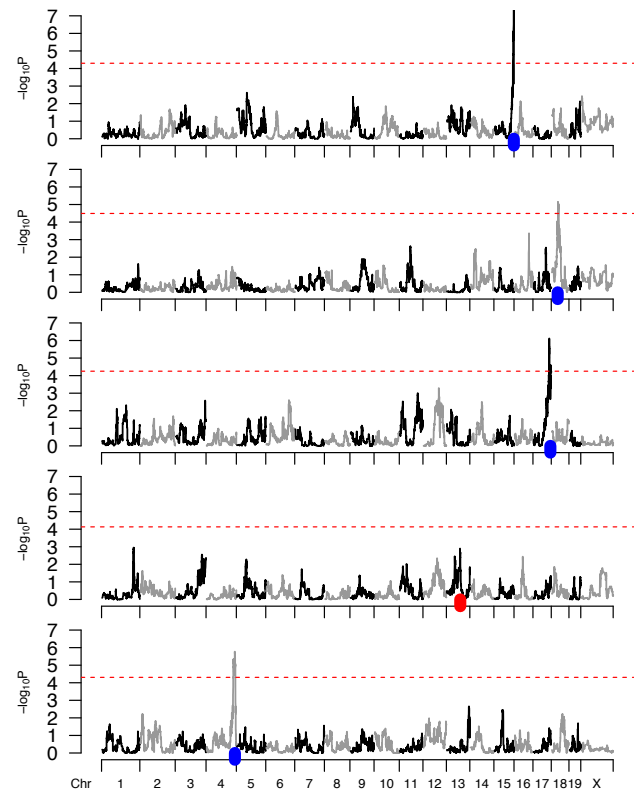

**Figure 2** Simulated CC data and resulting genome scans. Five simulated genome scans are generated by the code provided in a simple example using our package SPARCC. Red dashed lines represent 95% significance thresholds based on 100 permutation scans. A blue tick represents the simulated position for a QTL that was successfully detected, whereas a red tick marks a QTL that was missed. These simulations were based on a specified set of 65 CC strains, five replicates of each strain, two functional alleles, 10% QTL effect size, and no background strain effect. The QTL is not mapped in the fourth simulation, ranked top to bottom, resulting in a power of 80%. Actual power calculations are based on a greater number of simulations.

507 or as the variance explained in the realized population (Defini-  
508 tion DAMB). In this section we focus on results using the first  
509 of these, Definition B, owing to its more consistent theoretical  
510 interpretation. Under that definition, plots of power against  
511 numbers of strains are shown in **Figure 3**, and power across a  
512 representative selection of conditions is shown in **Table 1**. For  
513 comparison, these numbers are also provided for simulations  
514 under Definition DAMB in **Table S1**. Throughout these simula-  
515 tions the false positive rate was controlled at the target 0.05 level  
516 (**Figure S2**).

#### 517 **Large effect QTL usually detected by 50 or more strains**

518 As a baseline for describing mapping power in the CC, an experi-  
519 ment using one replicate ( $r = 1$ ) of all 72 strains is well-powered  
520 to detect QTL explaining  $>40\%$  of phenotypic variance but mod-  
521 erately or low powered for QTL explaining 30% or less (**Table**  
522 **1**). Specifically, assuming eight functional alleles, there is 96.4%  
523 power to detect a 50% QTL, 79.2% for a 40% QTL, 44.1% for a  
524 30% QTL, and 12.4% for a 20% QTL.

525 More broadly, simulations across different allele effect types  
526 and numbers of strains showed that studies without replicates

527 and with large numbers of strains (>50) were found to be well- 586  
528 powered to detect large effect QTL (>40%) (Figure 3 [top]). 587

529 Identifying smaller effect QTL is feasible, however, using 588  
530 replicates. Replicates improve power by reducing the individual 589  
531 noise variance; as such the extent of the power improvement 590  
532 diminishes as more variance is attributable to background strain 591  
533 effects than noise. Assuming no background strain effect, and 592  
534 using 50 strains, the power to detect a 20% effect-size QTL with 593  
535 a single replicate is near zero; with 5 replicates it approaches 594  
536 80%; detecting QTL with effect sizes  $\leq 10\%$  is challenging. For 595  
537 example, achieving 80% power to detect an effect size of 10% 596  
538 when all 72 CC strains were used required more than 5 replicates 597  
539 per strain (Figure 3 [middle right]). Assuming a background 598  
540 strain effect, as would be expected with a complex trait, can 599  
541 reduce the QTL mapping power of small effect QTL substantially 600  
542 (Figure 3 [bottom]). 601

#### 543 **Additional strains improve power more than additional repli-** 602 544 **cates** 603

545 We investigated the relationship between power and the total 604  
546 number of mice, evaluating whether power gains were greater 605  
547 with additional CC strains or additional replicate observations. 606  
548 Power was interpolated over a grid of values for number of 607  
549 replicates and total number of mice from simulations based on 608  
550 a single observation per strain (Figure 5). This showed that 609  
551 additional CC strains improved mapping power more than ad- 610  
552 ditional replicates; this is indicated by higher power values for 611  
553 lower numbers of replicates while holding number of mice con- 612  
554 stant (see Figure 5, bordered vertical section at 250 mice). 613

#### 555 **Location error of detected QTL** 614

556 To obtain an approximation of mapping resolution, for all true 615  
557 positive detections we recorded the location error, or the ge- 616  
558 nomic distance between simulated and detected QTL. The mean 617  
559 and the 95% quantile of the location error are reported as stabil- 618  
560 ized estimates for different numbers of strains and QTL effect 619  
561 sizes, but averaged over all other conditions, in Figure 4. (The 620  
562 stabilization procedure is described in Methods; raw, unstabil- 621  
563 ized estimates provided Figure S3.) The location error statistics 622  
564 require careful interpretation: for a detection to be classed as 623  
565 a true positive it had to be within 5Mb of the simulated QTL; 624  
566 therefore, location error was artificially capped at 5Mb. Mediocre 625  
567 performance thus corresponds to when that location seems uni- 626  
568 formly (and therefore arbitrarily) distributed over the  $\pm 5$ Mb 627  
569 interval, that is, having a mean of 2.5Mb and a 95% quantile of 628  
570 4.8Mb. 629

571 Location error was improved (reduced) by increasing the 630  
572 number of strains, increasing the QTL effect size, or both. In 631  
573 particular, as with power, location error was improved by in- 632  
574 creasing the number of strains even when while holding the total 633  
575 number of mice constant (Figure S4), consistent with mapping 634  
576 resolution being improved by an increased number of recombi- 635  
577 nation events in the QTL region. Distributions of raw location 636  
578 error, stratified by levels of the number of strains, the number of 637  
579 functional alleles, and the QTL effect size can be found in Figure 638  
580 S6. 639

#### 581 **False positive rate** 640

582 The FPR for the QTL power simulations was estimated as the 641  
583 percentage of scans (per setting) that produced a statistically 642  
584 significant signal on a chromosome without a QTL, shown in 643  
585 Figure S2. As expected, FPR was not elevated from 5% when 644  
645

the strain effects were simulated independently, as the effects 586  
587 were exchangeable by construction. The FPR did not vary with 588  
589 the number of strains or the number of alleles. 590

591 In additional null simulations that where strain effects were 592  
593 correlated due to realized genomic similarity, QTL scans assum- 594  
595 ing independent strain effects (and thus, exchangeability) had 596  
597 elevated FPR (Figure 6 and Table S2). Using all 72 CC strains, 598  
599 the FPR varied from a maximum of 14.5% when strain effects 600  
601 explain all variability to the well controlled FPR of 5.5% when 602  
603 the strain effects were relatively small. Omitting CC059, one of 604  
605 the highly-related cousin strains (CC053 and CC059), because 606  
607 of its obvious violation of equal relatedness, reduced the FPR, 608  
609 although it was still elevated (12.9% for maximum strain effect). 610  
611 This demonstrates that, when strain effects are large relative to 612  
613 individual error (i.e. highly heritable trait, or the use of many 614  
615 replicates), failure to account for population structure due to 616  
617 realized imbalance in founder contributions can increase the risk 618  
619 of false positives. 620

#### 604 **Beavis effect** 605

606 It is an expected feature of QTL mapping studies that estimates 607  
608 of QTL effect size, when calculated only for detected QTL, will 609  
610 be biased upwards. This phenomenon, known as the Beavis 611  
612 effect, is a form of selection bias and as such is expected to be 613  
614 most extreme under low power conditions, e.g., when detection 615  
616 rates are low and/or estimates have high variance. 617

618 We explored the Beavis effect in our simulations. Assuming 619  
620 a one-replicate ( $r = 1$ ) experiment, we found that, for example, 621  
622 the estimated effect size of a simulated 20% QTL was inflated 623  
624 by 3-fold when mapping in 40 CC strains, and by 2-fold when 625  
626 mapped in 72 CC strains. More generally, and as expected, the 627  
628 Beavis effect was reduced with larger numbers of strains and 629  
630 larger QTL effect sizes (Figure 7). 631

632 These results also imply that the Beavis effect is reduced by 633  
634 replication, at least to the extent that replication boosts effective 634  
635 QTL effect size. For example, consider again the mapping of 635  
636 a 20% QTL effect in 40 strains, which with  $r = 1$  replicates 636  
637 implies 3-fold effect size inflation. Although this inflation could 637  
638 be reduced to 2-fold by increasing the number of strains to 72, 638  
639 the same reduction could be achieved by replication: assuming 639  
640 no background strain effect, increasing replicates to a theoretical 640  
641  $r = 1.8$  (so as to give a total sample size of  $N = 40 \times 1.8 = 72$ ) 641  
642 would boost the QTL effect size to an effective  $\approx 31\%$  (according 642  
643 to Eq 4) and, as shown in Figure 7, have approximately the 643  
644 same result. The ability of replicates to reduce the Beavis effect, 644  
645 however, will diminish to the extent that there is a significant 645  
646 background strain effect, following the general relationship of 646  
647 replicates and QTL effect size described in Eq 4. 647

#### 633 **Allele frequency imbalance reduces power** 634

635 For a fixed set of QTL allele effects, it is expected that power will 636  
637 always be greatest when allele frequencies are balanced. Accord- 637  
638 ingly, when QTL effect size was defined in terms of the variance 638  
639 that would be explained in a theoretical population with bal- 639  
640 anced allele frequencies (Definition B), deviations from balance 640  
641 in the mapping population—either from imbalance in functional 641  
642 alleles among the founders or imbalance of the founders among 642  
643 the CC strains—inevitably reduce power (Figure 8A). This re- 643  
644 duction in power under Definition B is most evident for bi-allelic 644  
645 QTL (pink), in which the potential imbalance in allelic series is 645  
646 most extreme, namely when a single founder carries one func- 646  
647 tional allele and the other seven possess the alternative allele 647

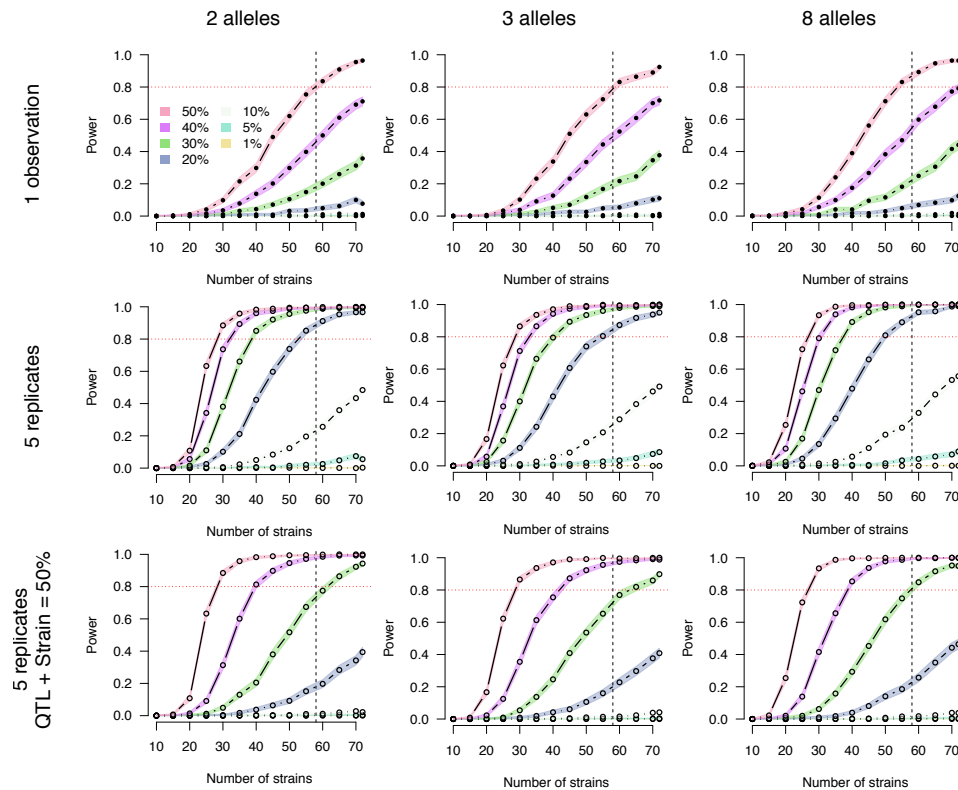

**Figure 3** Power curves by number of CC strains. Results are stratified by a number of replicates, background strain effect size, and the number of functional alleles. The **[top]** row is based on a single observation per strain and no background strain effect. The **[middle]** row corresponds to five replicates per strain and no background strain effect. For the **[bottom row]**, five replicates are observed and the QTL effect size and background strain effect size sum to 50%, thus penalizing smaller QTL more harshly. The horizontal red dotted line marks 80% power. The vertical black dashed line marks 58 strains, which is currently the number of unrelated strains available from UNC. The columns, left to right, correspond to two, three, and eight functional alleles. Closed circles represent power estimates that were directly assessed, whereas open circles were interpolated. Simulations are based on Definition B.



**Table 1 QTL mapping power in the Collaborative Cross based on QTL effect sizes in a balanced population (Definition B)**

| QTL                |                    |                    | Power      |           |           |            |           |           |            |           |           |       |
|--------------------|--------------------|--------------------|------------|-----------|-----------|------------|-----------|-----------|------------|-----------|-----------|-------|
|                    |                    |                    | 30 strains |           |           | 50 strains |           |           | 72 strains |           |           |       |
| 1 obs <sup>a</sup> | 3 rep <sup>b</sup> | 5 rep <sup>b</sup> | 2 alleles  | 3 alleles | 8 alleles | 2 alleles  | 3 alleles | 8 alleles | 2 alleles  | 3 alleles | 8 alleles |       |
| 0.01               | 0.003              | 0.002              | 0.001      | 0.000     | 0.000     | 0.000      | 0.001     | 0.001     | 0.001      | 0.001     | 0.000     | 0.000 |
| 0.05               | 0.017              | 0.010              | 0.001      | 0.001     | 0.002     | 0.004      | 0.000     | 0.001     | 0.007      | 0.000     | 0.003     | 0.003 |
| 0.1                | 0.036              | 0.022              | 0.001      | 0.001     | 0.001     | 0.006      | 0.003     | 0.004     | 0.013      | 0.013     | 0.014     | 0.014 |
| 0.15               | 0.056              | 0.034              | 0.001      | 0.003     | 0.002     | 0.009      | 0.011     | 0.014     | 0.035      | 0.054     | 0.041     | 0.041 |
| 0.2                | 0.077              | 0.048              | 0.006      | 0.009     | 0.003     | 0.032      | 0.026     | 0.030     | 0.077      | 0.110     | 0.124     | 0.124 |
| 0.25               | 0.100              | 0.062              | 0.002      | 0.011     | 0.015     | 0.076      | 0.061     | 0.066     | 0.207      | 0.231     | 0.252     | 0.252 |
| 0.3                | 0.125              | 0.079              | 0.011      | 0.014     | 0.010     | 0.105      | 0.118     | 0.116     | 0.357      | 0.377     | 0.441     | 0.441 |
| 0.35               | 0.152              | 0.097              | 0.018      | 0.024     | 0.034     | 0.194      | 0.207     | 0.261     | 0.553      | 0.564     | 0.633     | 0.633 |
| 0.4                | 0.182              | 0.118              | 0.035      | 0.038     | 0.056     | 0.298      | 0.335     | 0.383     | 0.711      | 0.717     | 0.792     | 0.792 |
| 0.45               | 0.214              | 0.141              | 0.048      | 0.063     | 0.078     | 0.456      | 0.467     | 0.539     | 0.858      | 0.857     | 0.905     | 0.905 |
| 0.5                | 0.250              | 0.167              | 0.098      | 0.102     | 0.114     | 0.620      | 0.630     | 0.712     | 0.964      | 0.924     | 0.964     | 0.964 |
| 0.55               | 0.289              | 0.196              | 0.156      | 0.180     | 0.208     | 0.789      | 0.784     | 0.860     | 0.977      | 0.961     | 0.993     | 0.993 |
| 0.6                | 0.333              | 0.231              | 0.272      | 0.251     | 0.304     | 0.914      | 0.896     | 0.935     | 0.990      | 0.984     | 0.998     | 0.998 |
| 0.65               | 0.382              | 0.271              | 0.387      | 0.412     | 0.486     | 0.953      | 0.934     | 0.985     | 0.993      | 0.992     | 0.999     | 0.999 |
| 0.7                | 0.438              | 0.318              | 0.603      | 0.582     | 0.635     | 0.983      | 0.965     | 0.994     | 0.998      | 0.993     | 1.000     | 1.000 |
| 0.75               | 0.500              | 0.375              | 0.780      | 0.746     | 0.818     | 0.990      | 0.986     | 0.999     | 0.998      | 0.999     | 1.000     | 1.000 |
| 0.8                | 0.571              | 0.444              | 0.890      | 0.851     | 0.923     | 0.995      | 0.991     | 1.000     | 0.999      | 1.000     | 1.000     | 1.000 |
| 0.85               | 0.654              | 0.531              | 0.932      | 0.927     | 0.983     | 0.997      | 0.995     | 0.999     | 1.000      | 1.000     | 1.000     | 1.000 |
| 0.9                | 0.750              | 0.643              | 0.970      | 0.955     | 0.994     | 0.999      | 0.999     | 1.000     | 1.000      | 0.999     | 1.000     | 1.000 |
| 0.95               | 0.864              | 0.792              | 0.976      | 0.966     | 1.000     | 0.999      | 0.998     | 1.000     | 1.000      | 1.000     | 1.000     | 1.000 |

<sup>a</sup> Convert QTL effect sizes from experiments with replicates to mean scale with Eq 4.

<sup>b</sup> Based on no background strain effect.

646 (7v1).

647 Conversely, when the QTL effect size is defined in terms  
648 of variance explained in the mapping population (Definition  
649 DAMB, which is similar to an  $R^2$  measure), power remains  
650 constant across different allelic series and degrees of balance.  
651 Although note that this definition carries with it the (possibly  
652 unrealistic) implication that allele effects vary depending what  
653 population they are in.

654 When averaged over many allelic series, QTL mapping power  
655 based on Definition B is reduced relative to Definition DAMB,  
656 with the greatest reduction occurring for bi-allelic QTL (**Figure 8**  
657 **B**). Though this modest reduction in power may seem to suggest  
658 that simulating with respect to a balanced population (Definition  
659 B) versus the mapping population (Definition DAMB) is unim-  
660 portant in terms of designing a robust mapping experiment in  
661 the CC, we reiterate the value of using Definition B. Specifically,  
662 simulating with respect to Definition DAMB is overly optimistic  
663 regarding mapping power for QTL with imbalanced allelic se-  
664 ries.

665 We performed additional simulations to evaluate bi-allelic  
666 QTL in more detail, these being more prone to drastic imbalance  
667 under Definition B. All 127 possible bi-allelic series are visu-

668 alized as a grid in **Figure 9A**, ordered from balance and high  
669 power to imbalance and low power. The corresponding power  
670 estimates are shown in **Figure 9B**. Power was maximized when  
671 the bi-allelic series is balanced (4v4; 35/127 possible allelic series)  
672 and minimized when imbalanced (7v1; 8/127 possible allelic  
673 series). Uniform sampling of bi-allelic series, the approach in  
674 the more general simulations described earlier, slightly reduced  
675 power relative to balanced 4v4 allelic series due to averaging  
676 over many cases of balance and some cases of extreme imbal-  
677 ance. These latter, more focused simulations highlight the extent  
678 that the reduction in QTL effect size, and thus mapping power,  
679 when simulating based on Definition B, is highly dependent on  
680 the allelic series. This could be of particular importance when  
681 considering QTL that result from a causal variant inherited from  
682 a wild-derived founder, such as CAST, which will present as  
683 both imbalanced and bi-allelic.

## 684 Discussion

685 Now that the CC strains have been largely finalized, it is possible  
686 to investigate more deeply how, in potential mapping experi-  
687 ments, power is affected by factors such as the number of strains,  
688 the number of replicates, and the allelic series at the QTL. We

A

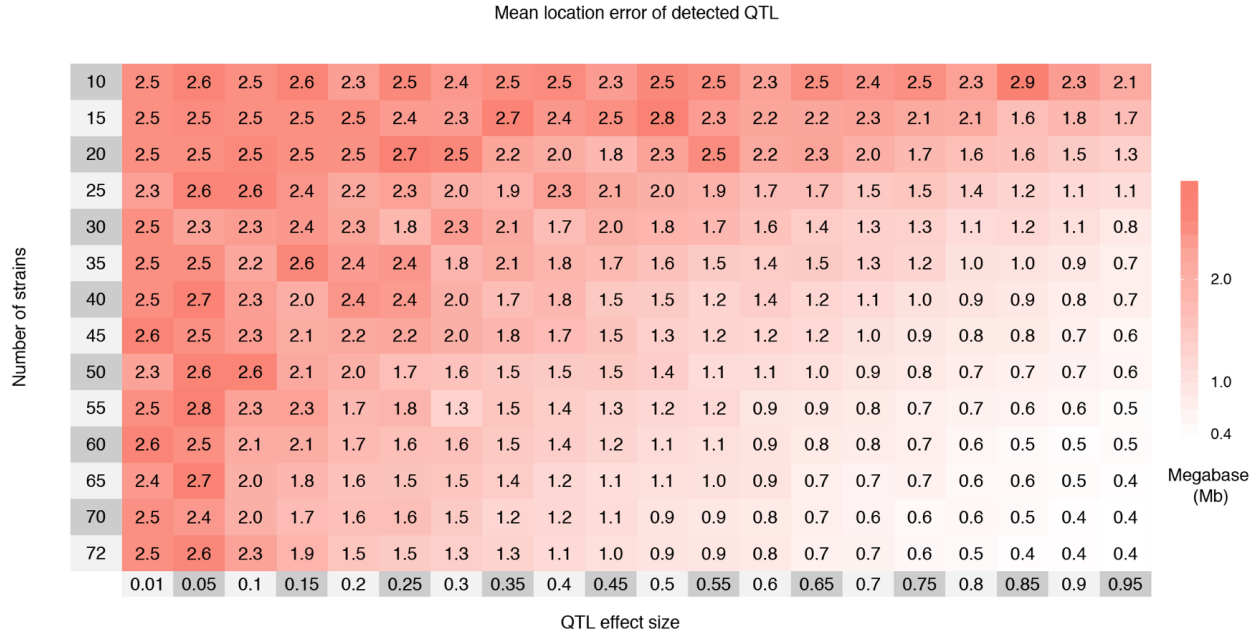

B

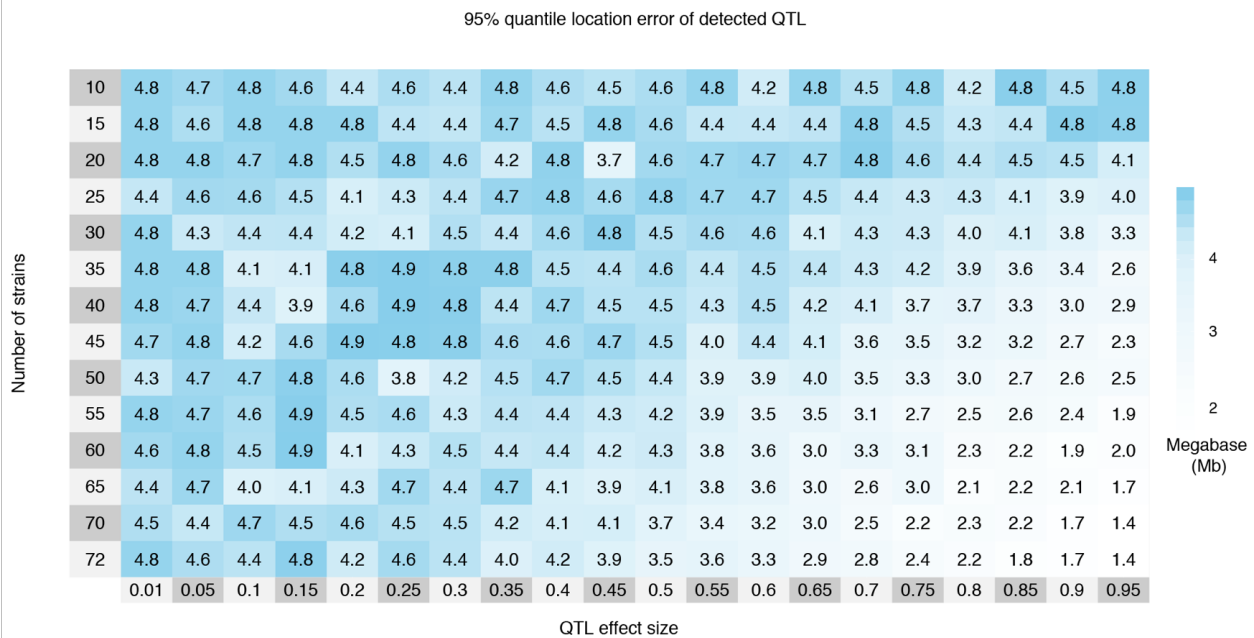

**Figure 4** The mean (A) and 95% quantile (B) of location error, the distance in Mb between the detected and simulated QTL, by effect size and number of strains for 1,000 simulations of each setting. The simulations are based on Definition B with an eight allele QTL, and only a single observation per strain. Cells are colored red to white with decreasing mean and blue to white with decreasing 95% quantile. Regularization of the means and 95% quantile was accomplished through averaging the observed results with pseudo-counts; see **Figure S3** for the raw measurements. Increasing the number of strains reduces the location error, both in terms of the mean and 95% quantile, more so than QTL effect size, also shown in **Figure S6**. The maximum possible location error was 5Mb due to the 10Mb window centered around the true QTL position used for detecting QTL.

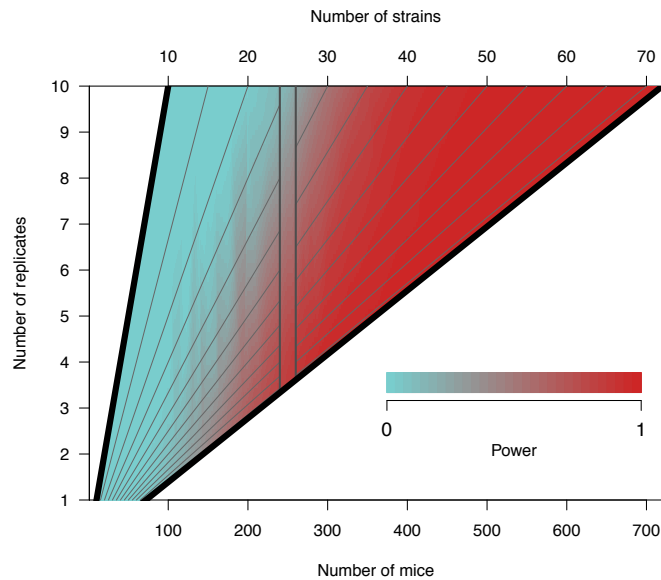

**Figure 5** Heatmap of QTL mapping power by number of replicates and total number of mice in the experiment. Power is based on a QTL effect size of 20%, no background strain effect, and two functional alleles, though varying these parameters does not affect the dynamic between number of strains and replicates. The gray diagonal lines represent fixed values of the number of CC strains, ranging from 10 to 70 in intervals of five. Holding the total number of mice fixed, power is reduced as the percentage of the sample that are replicates is increased. This is illustrated with a cutout band centered on 250 mice, where power is lower at the top of the band when replicate mice are a relatively higher proportion of the total number of mice.

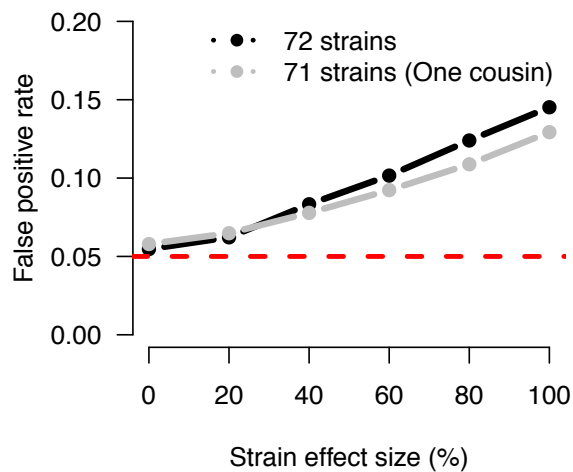

**Figure 6** The FPR increases due to population structure among the realized genomes of the CC strains in the presence of a background strain effect and no QTL. Curves are based on 10,000 simulations for each setting of strain effect and strain sample, based on a single observation per strain. The inflation in FPR is greater for all 72 CC strains, which includes two closely related cousin strains (CC051 and CC059). Removing CC059 reduces the inflation in FPR (gray line). The dashed red line marks the specified type I error rate of 0.05, which is approximately met as expected when no strain effect is simulated, as in **Figure S2**. **Table S2** reports the specific FPR values.

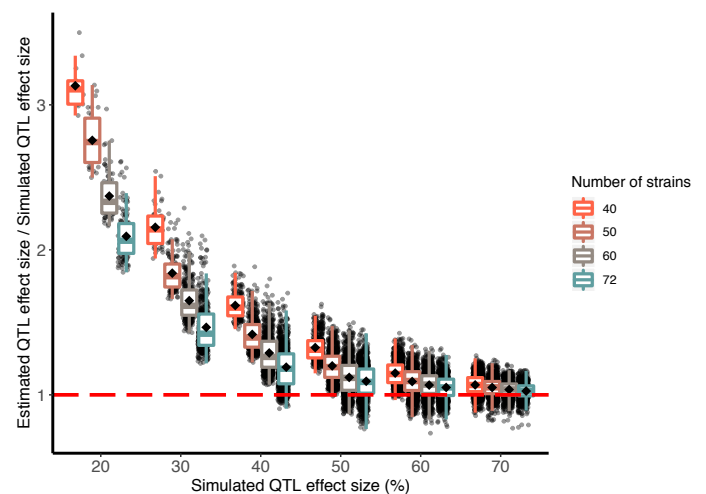

**Figure 7** The Beavis effect (inflation of QTL effect size estimates) is more pronounced with smaller simulated QTL effect sizes and reduced numbers of strains. For different settings of numbers of strains (40, 50, 60, 72) and simulated QTL effect sizes (20%, 30%, 40%, 50%, 60%, 70%), black dots plot the ratio of the estimated effect size at a detected QTL peak to the effect size that was simulated at the true QTL locus. Out of 1,000 simulations under each setting, only successful detections are shown. Black diamonds represents the mean ratio for a category; horizontal red dashed line marks a ratio of 1, when QTL effect size estimates are unbiased (*i.e.*, no Beavis effect).

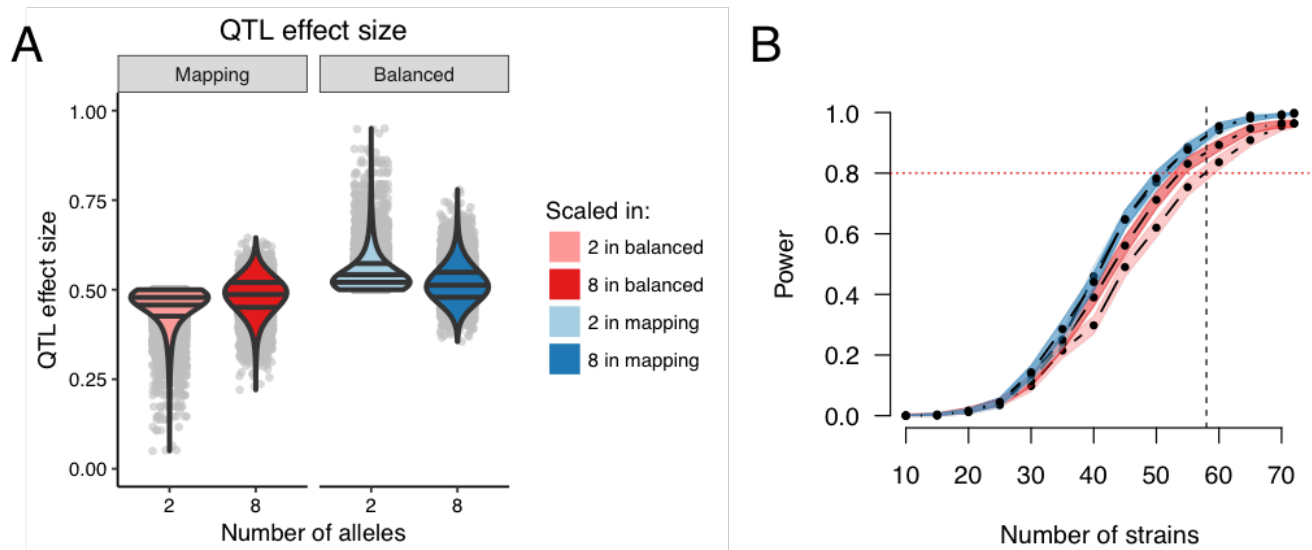

**Figure 8** QTL effect sizes are in reference to a population, though effect size in the specific mapping population will determine the mapping power. Consider two populations as examples: the mapping population (definition DAMB) and a population balanced in the functional alleles (definition B). (A) QTL effect size distributions based on 10,000 simulations of the QTL for 72 strains. Using definition B, the effect sizes for the mapping population for two alleles is pink and eight alleles is red. Using definition DAMB, the effect sizes in the balanced population for two alleles is light blue and eight alleles is dark blue. Horizontal lines within the violin plots represent the 25<sup>th</sup>, 50<sup>th</sup>, and 75<sup>th</sup> quantiles from the estimated densities. Gray dots represent actual data points. (B) Power curves corresponding to the previously described settings of alleles and QTL effect size definitions. Power curves are estimated from 1,000 simulations per number of strains for a 50% QTL, no background strain effect, and a single observation per strain. The horizontal red dotted line marks 80% power. The vertical black dashed line marks 58 strains, which is currently the number of unrelated strains available from UNC.

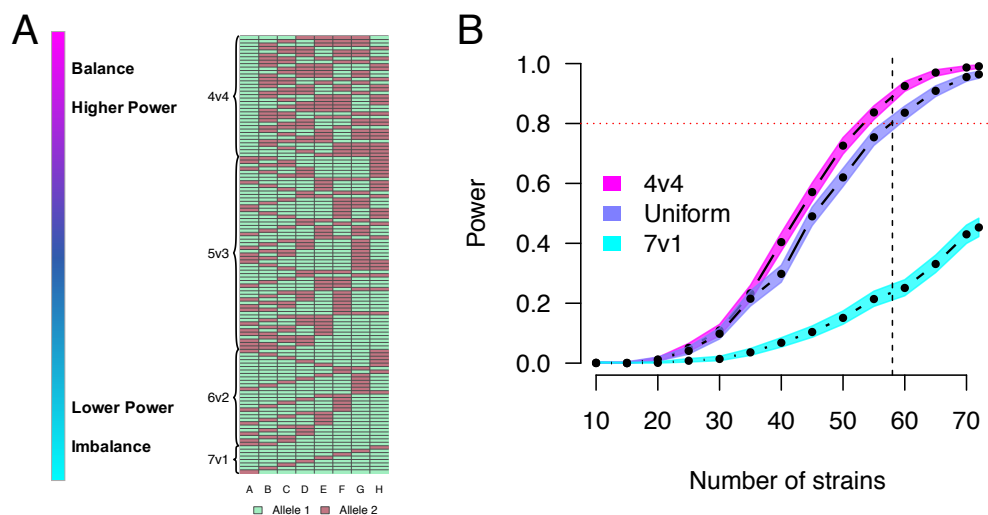

**Figure 9** The balance of the allelic series for QTL with two functional alleles, and its effect on QTL mapping power. (A) The 127 possible allelic series for a bi-allelic QTL, categorized by the balance in the distribution of alleles among the CC founder strains, and ordered with balanced allelic series at the top and imbalanced at the bottom. (B) Power curves comparing three different sampling approaches for populations simulated to have a QTL effect size of 50% in a balanced theoretical population, with a single observation per CC strain. The horizontal red dotted line marks 80% power. The vertical black dashed line marks 58 strains, which is currently the number of unrelated strains available from UNC.

689 find that the CC can powerfully map large effect QTL ( $\geq 50\%$ ) 750  
690 with single observations of  $> 60$  strains. Through the use of 751  
691 replicates, the power to map QTL can be greatly improved, po- 752  
692 tentially mapping QTL  $\geq 20\%$  in 60 strains with 5 replicates per 753  
693 strain with no background strain effect. To guide the design 754  
694 of new CC experiments, we provide broad power curves and 755  
695 tables in **Figure 3** and **Tables 1** and **S1**. 756

696 The power calculations described here take advantage of re- 757  
697 alized CC genomes, allowing the power estimates to be highly 758  
698 specific to the available strains but also necessarily restricting 759  
699 the number that can be used. This differs from the simulations of 760  
700 Valdar *et al.* (2006a), which primarily focused on comparing po- 761  
701 tential breeding designs with numbers of strains that far exceed 762  
702 (500-1,000) the realized population (50-70). As such, directly 763  
703 comparing these studies is challenging. The closest comparison 764  
704 case is for a 5% QTL with 45% background strain effect with 765  
705 100 simulated strains with 10 replicates, for which Valdar *et al.* 766  
706 (2006a) estimates 4% power. Matching those settings with the 767  
707 exception of 72 strains instead of 100, and using the DAMB def- 768  
708 inition of QTL effect size, we find 0.4% power. The relatively 769  
709 lower power with the realized data likely reflects both reduction 770  
710 in the number of strains by 28% (72 to 100) and the deviations 771  
711 from an ideally-randomized population, such as the observed 772  
712 reduction in contributions from the CAST and PWK founders 773  
713 (Srivastava *et al.* 2017). This emphasizes the challenge in pro- 774  
714 jecting the results from Valdar *et al.* (2006a) into the realized 775  
715 population for the purpose of designing an experiment. 776

716 We did not attempt power simulations with epistatic QTL or 777  
717 phenotypes with large background strain effect. From the results 778  
718 of Valdar *et al.* (2006a), it was clear that mapping studies in the 779  
719 realized CC, even with replicates, would not be well-powered 780  
720 in those contexts. Nonetheless, despite the reduced number of 781  
721 strains of realized population, we found that successful mapping 782  
722 experiments can be designed in the realized CC, particularly by 783  
723 harnessing the ability of genetic replicates to reduce random 784  
724 noise, as well as within the context of molecular phenotypes 785  
725 such as gene expression for which the genetic architecture is 786  
726 relatively simple. 787

### 727 **Interpreting QTL effect sizes**

728 Our simulations suggest that QTL mapping experiments in the 788  
729 CC are well-powered for large-effect QTL, in the neighborhood 789  
730 of 20-40%, depending on the number of strains and replicates, 790  
731 and the presence of a background strain effect. As such, it is 791  
732 useful to provide some context for what traits might plausibly 792  
733 yield QTL of this size. That said, we note that comparisons of 793  
734 reported estimates of QTL effect size should be interpreted with 794  
735 caution since they vary across different traits and model systems, 795  
736 are calculated under different experimental protocols that may 796  
737 imply different levels of noise, such as different numbers of 797  
738 strains or replicates, and may be estimated by different analysis 798  
739 conditions (statistical methods, data transformations, etc.). And 799  
740 ultimately, these estimates are subject to overestimation due to 800  
741 both the aforementioned Beavis effect and reporting bias. 801

742 Multiple studies in the pre-CC, which had more strains than 802  
743 the realized CC population, have reported QTL effect sizes for 803  
744 a variety of traits. Philip *et al.* (2011) report effect sizes for 804  
745 QTL for 102 morphological and behavioral traits in 235 incipient 805  
746 CC strains, ranging from 5.3% (tail-clip latency) to 26% (red cell 806  
747 distribution width). Durrant *et al.* (2011) mapped seven QTL for 807  
748 susceptibility to *Aspergillus fumigatus* infection in 371 mice from 808  
749 66 strains, with effects ranging from 12.2-16.2%. Gralinski *et al.* 809  
810

(2015) identified four SARS susceptibility QTL in 140 strains 810  
with effect sizes between 21-26% (vascular cuffing, 21% and 26%;  
viral titer, 22%; eosinophilia, 26%).

More closely mirroring the number of strains considered here,  
Levy *et al.* (2015) detected six strong QTL for traits related to  
trabecular bone microstructure using 160 mice from 31 strains,  
which ranged from 61-86%. In an ongoing project involving  
the mapping of expression QTL (eQTL) from RNA-seq data col-  
lected from three tissues of single individuals from 47 strains,  
478-739 eQTL were detected at genome-wide significance, rang-  
ing in effect size from 60-90%. These results reiterate that QTL  
mapping studies in the CC are best suited for detection of large  
effect QTL, as are more common in molecular traits.

In considering the above, it is useful to understand how this  
relates to effect sizes seen in humans, for which the CC is often  
used as a model system (Flint and Mackay 2009). In particular,  
human GWASs, which often use much larger sample sizes, rou-  
tinely report QTL with estimated effect sizes far smaller than is  
detectable in the CC. Nonetheless, there are reasons to expect ef-  
fect sizes in the CC to be larger than in humans. Human GWASs  
are observational, and as such include many additional sources  
of noise, reducing QTL effect sizes relative to what would be  
possible in more tightly-controlled experimental designs. Ex-  
perimental populations will also have larger QTL effect sizes  
because: 1) they typically have more balanced allele frequencies;  
2) in the case of panels of RILs such as the CC, because they are  
homozygous across the genome, which increases the contrast in  
additive allele effects and thus boosts additive QTL effect size;  
and 3), again for RILs, because they furnish biological replicates,  
which, as illustrated in Eq 4, can increase effect size by reducing  
individual error.

### 781 **Strains versus replicates**

782 When holding the total number of mice fixed, we found that 782  
783 adding more strains improves power and reduces location error 783  
784 to a greater degree than does adding more replicates. Moreover, 784  
785 this inference was made in the absence of a background strain 785  
786 effect—given that replicates reduce individual-level variance 786  
787 but not strain-level variance, the presence of background effects 787  
788 would reduce the relative value of replicates yet further. These 788  
789 observations are consistent with the results of Valdar *et al.* (2006a) 789  
790 and established theoretical arguments (Soller and Beckmann 790  
791 1990; Knapp and Bridges 1990). 791

792 Nonetheless, for many CC mapping experiments we predict 792  
793 that adding replicates will provide considerable value. First, for 793  
794 all but the most highly polygenic traits, mapping on the means 794  
795 of replicates, a strategy originally termed “replicated progeny” 795  
796 (Cowen 1988) or “progeny testing” (Lander and Botstein 1989), 796  
797 will always provide additional power. Indeed, with a limited 797  
798 number of strains available, and the possibility that all available 798  
799 strains are used, replication may sometimes be the only way 799  
800 power can be further increased (Belknap 1998). 800

801 Second, replicates provide not only an insurance policy 801  
802 against phenotyping errors, but also a way to average over 802  
803 batches and similar nuisance parameters (Cowen 1988), thus 803  
804 protecting against the negative consequences of gene by envi- 804  
805 ronment interactions while also providing the opportunity for 805  
806 such interactions to be detected [*e.g.*, Kafkafi *et al.* (2005, 2018)]. 806

807 Third, replicates enable deeper phenotypic characterization 807  
808 and in particular measurement of strain-level phenotypes that 808  
809 are necessarily a function of multiple individuals. For example, 809  
810 treatment response phenotypes (*e.g.*, response to drug) are ide-

ally defined in terms of counterfactual-like observations of drug-treated and vehicle-treated strain replicates [e.g., Festing (2010); Crowley *et al.* (2014)] and recombinant inbred lines such as the CC are uniquely able to combine such definitions with QTL mapping [e.g., Mosedale *et al.* (2017) and also, in flies, Kislukhin *et al.* (2013); Najarro *et al.* (2015)]. Similarly, strain-specific phenotypic variance ideally requires replicates (Rönnegård and Valdar 2011; Ayroles *et al.* 2015). We did not consider such elaborations here, but we expect the trade-off between number of strains vs replicates will be more nuanced in such cases.

### Population structure in the CC

Our simulations indicate that deviations from equal relatedness in the realized CC strains have introduced a degree of population structure that potentially increases the risk of false positives if not addressed, albeit to a far lesser extent than has been observed in traditional inbred strain association (Kang *et al.* 2008). In particular, null simulations that assumed correlated strain effects due to genetic relatedness increased FPR for our mapping approach when the strain effect was large relative to individual error, as would be the case for a highly heritable polygenic trait or when using many replicates. This elevated FPR supports the use of QTL mapping approaches that account for the effect of genetic similarity on phenotypes, such as a mixed effect model (Kang *et al.* 2008, 2010; Lippert *et al.* 2011; Zhou and Stephens 2012), especially in the context of marginally significant QTL, which may not remain significant given a higher threshold that controls FPR more appropriately. Software packages that can fit the LMM specifically with CC data include our miQTL package (available on GitHub at <https://github.com/gkeele/miqtl>) and R/qt2 (Broman *et al.* 2019).

For the analyses reported here, a mixed effect model approach was not feasible owing to its increased computational burden (and in particular, its incompatibility with the computational shortcut in **Appendix A**). Instead, we simulated independent strain effects and employed a fixed effect mapping procedure due to its computational efficiency, especially when computing permutation-based significance thresholds. Nonetheless, the conclusions drawn in this study should be largely consistent with the use of a mixed effect model that correctly controls for correlated strain effects due to genetic relatedness.

### Allelic series, and use of an eight allele mapping model

We found that the allelic series can strongly affect power through its influence on observed allele frequencies. Specifically, imbalanced bi-allelic QTL have significantly reduced mapping power whereas highly multi-allelic QTL do not because the potential for imbalance is reduced.

Regardless of the true allelic series at a QTL, which is unknown in practice, our statistical procedure assumed an eight allele model. For QTL with fewer functional alleles than founder strains, this assumption could reduce power due to the estimation of redundant allele effect parameters. Indeed, QTL consistent with a bi-allelic series have been more powerfully detected in some MPP studies using SNP association (Baud *et al.* 2013; Keele *et al.* 2018).

Nonetheless, multi-allelic QTL (with more than two alleles) do occur. This has been seen, for example, in cis-regulation of gene expression that largely corresponds to the three subspecies lineages of *Mus musculus*, present in the CC (Crowley *et al.* 2015). Moreover, multi-allelic QTL will not be as powerfully detected through SNP association, as seen, for example, in Aylor *et al.*

(2011). SNP (or more generally, variant) association also poses additional challenges, such as how to handle regions of the genome (and variants) that are difficult to genotype, as well as the requirement of extensive quality control filtering to remove markers with low minor allele frequencies. These challenges are implicitly reduced in haplotype analysis.

An ideal statistical procedure would formally model the unknown allelic series and their corresponding uncertainty. Though challenging, the development of alternative mapping strategies that specifically account for the allelic series is clearly an imperative methodological advance that would greatly benefit QTL analyses in MPPs with diverse founder alleles. That said, allelic series-aware approaches would likely be computationally expensive and poorly suited to simulation-based power analyses. Meanwhile, in the absence of more sophisticated approaches, the eight allele model, though potentially redundant, has several advantages over SNP association that suggest it will remain a useful (and maybe the default) tool for CC mapping, namely: it encompasses all possible simpler allelic series, implicitly models local epistasis, and, in reflecting the LD decay around detected QTL, more clearly delineates the limits of mapping resolution.

### Inclusion of extinct CC strains in simulations

Our simulations included genomes from CC strains that are now extinct, and also did not include all the CC strains that are currently available. This discrepancy reflects the inherent challenge of maintaining a stable genetic population resource. RI panels, such as the CC, are an approximation to an ideal: they attempt to provide reproducible genomes that can be observed multiple times as well as across multiple studies; yet, as a biological population, the genomes are mutable, and through time will accumulate mutations and drift, and even potentially go extinct.

Although the inclusion of genomes of extinct strains, or those that have drifted since the strains were genotyped, result in power calculations that do not perfectly correspond to the current CC population, they are preferable to simulated genomes, since they represent genomes that were viable at some point. We view the use of extinct genomes as realistic observations of possible genomes that reflect both the potential that more strains will become extinct or be gained from other breeding sites with time, and thus can be reasonably extended to the realized population, now and into the future.

### Future use and directions

Any analysis of power is subject to the assumptions underlying that analysis. One of the advantages of simulation is the ability to evaluate the impact of many of these assumptions, as well as the consideration of new scenarios by re-running the simulation under different settings, or by elaborating the simulation itself. We have attempted to make re-running the simulations under different settings straightforward for other researchers by developing a software package for this purpose. This package could be used to investigate highly-specialized questions, such as the power for specific combinations of CC strains or assessing how the power to detect QTL varies depending on genomic position. In future work, the simulation code itself could be expanded to investigate additional topics of interest, such as how variance heterogeneity or model mis-specification influence power.

### Conclusion

We used a focused simulation approach that incorporates realized CC genomes to provide more accurate estimates of QTL

930 mapping power than were previously possible. As such, the  
931 results of our simulations provide tailored power calculations to  
932 aide the design of future QTL mapping experiments using the  
933 CC. Additionally, we evaluate how the balance of alleles at the  
934 QTL can strongly influence power to map QTL in the CC. We  
935 make available the R package SPARCC that we developed for  
936 running these simulations and analyses. It leverages an efficient  
937 model fitting approach in order to explore power in a level of  
938 detail that has previously been impractical, it is replicable, and  
939 it can be extended to user-specified questions of interest.

## 940 Acknowledgments

941 This work was primarily supported by the National Institute of  
942 General Medical Sciences under awards R01-GM104125 and R35-  
943 GM127000 (to W.V) and the National Institute of Environmental  
944 Health Sciences under award R01-ES024965 (to S.N.P.K). Com-  
945 puting resources were generously provided by the University of  
946 North Carolina Information Technology Services.

947 Author contributions: GRK, WLC, SNP, and WV wrote the  
948 manuscript. GRK and WLC performed the statistical analysis.  
949 The authors declare no conflicts of interest.

## 950 Literature Cited

951 Aylor, D. L., W. Valdar, W. Foulds-mathes, R. J. Buus, R. A.  
952 Verdugo, *et al.*, 2011 Genetic analysis of complex traits in the  
953 emerging Collaborative Cross. *Genome research* **21**: 1213–22.  
954 Ayroles, J. F., S. M. Buchanan, C. O’Leary, K. Skutt-Kakaria, J. K.  
955 Grenier, *et al.*, 2015 Behavioral idiosyncrasy reveals genetic  
956 control of phenotypic variability. *Proceedings of the National*  
957 *Academy of Sciences* **112**: 6706–6711.  
958 Baud, A., R. Hermsen, V. Guryev, P. Stridh, D. Graham, *et al.*,  
959 2013 Combined sequence-based and genetic mapping analysis  
960 of complex traits in outbred rats. *Nature genetics* **45**: 767–75.  
961 Beavis, W., 1994 The power and deceit of qtl experiments:  
962 lessons from comparative qtl studies. In *Proceedings of the*  
963 *forty-ninth annual corn and sorghum industry research conference*,  
964 pp. 250–266, Washington, DC.  
965 Belknap, J. K., 1998 Effect of within-strain sample size on GTL de-  
966 tection and mapping using recombinant inbred mouse strains.  
967 *Behavior Genetics* **28**: 29–38.  
968 Belknap, J. K., S. R. Mitchell, L. A. O’Toole, M. L. Helms, and J. C.  
969 Crabbe, 1996 Type I and type II error rates for quantitative  
970 trait loci (QTL) mapping studies using recombinant inbred  
971 mouse strains. *Behavior genetics* **26**: 149–60.  
972 Bouchet, S., M. O. Olatoye, S. R. Marla, R. Perumal, T. Tesso, *et al.*,  
973 2017 Increased Power To Dissect Adaptive Traits in Global  
974 Sorghum Diversity Using a Nested Association Mapping Pop-  
975 ulation. *Genetics* **206**: 573–585.  
976 Broman, K. W., D. M. Gatti, P. Simecek, N. A. Furlotte, P. Prins,  
977 *et al.*, 2019 R/qtl2: Software for Mapping Quantitative Trait  
978 Loci with High-Dimensional Data and Multiparent Popula-  
979 tions. *Genetics* **211**: 495–502.  
980 Brown, L. D., T. T. Cai, and A. DasGupta, 2001 Interval Estima-  
981 tion for a Binomial Proportion. *Statistical Science* **16**: 101–117.  
982 Chesler, E. J., D. R. Miller, L. R. Branstetter, L. D. Galloway, B. L.  
983 Jackson, *et al.*, 2008 The Collaborative Cross at Oak Ridge Na-  
984 tional Laboratory: developing a powerful resource for systems  
985 genetics. *Mammalian Genome* **19**: 382–389.  
986 Churchill, G. A., D. C. Airey, H. Allayee, J. M. Angel, A. D. Attie,  
987 *et al.*, 2004 The Collaborative Cross, a community resource  
988 for the genetic analysis of complex traits. *Nature Genetics* **36**:  
989 1133–1137.

990 Collaborative Cross Consortium, 2012 The genome architecture  
991 of the Collaborative Cross mouse genetic reference population.  
992 *Genetics* **190**: 389–401.  
993 Cowen, N. M., 1988 The use of replicated progenies in marker-  
994 based mapping of QTL’s. *Theoretical and Applied Genetics*  
995 **75**: 857–862.  
996 Crowley, J. J., Y. Kim, A. B. Lenarcic, C. R. Quackenbush, C. J.  
997 Barrick, *et al.*, 2014 Genetics of adverse reactions to haloperidol  
998 in a mouse diallel: a drug-placebo experiment and Bayesian  
999 causal analysis. *Genetics* **196**: 321–47.  
1000 Crowley, J. J., V. Zhabotynsky, W. Sun, S. Huang, I. K. Pakatci,  
1001 *et al.*, 2015 Analyses of allele-specific gene expression in highly  
1002 divergent mouse crosses identifies pervasive allelic imbalance.  
1003 *Nature genetics* **47**: 353–60.  
1004 Dell’Acqua, M., D. M. Gatti, G. Pea, F. Cattonaro, F. Coppens,  
1005 *et al.*, 2015 Genetic properties of the MAGIC maize population:  
1006 a new platform for high definition QTL mapping in *Zea mays*.  
1007 *Genome biology* **16**: 167.  
1008 Doerge, R. and G. Churchill, 1996 Permutation tests for multiple  
1009 loci affecting a quantitative character. *Genetics* **142**: 285–94.  
1010 Donoghue, L. J., A. Livraghi-Buttrico, K. M. McFadden, J. M.  
1011 Thomas, G. Chen, *et al.*, 2017 Identification of trans Protein  
1012 QTL for Secreted Airway Mucins in Mice and a Causal Role  
1013 for Bpifb1. *Genetics* **207**: 801–812.  
1014 Dudbridge, F. and B. P. Koeleman, 2004 Efficient Computation of  
1015 Significance Levels for Multiple Associations in Large Studies  
1016 of Correlated Data, Including Genomewide Association Stud-  
1017 ies. *The American Journal of Human Genetics* **75**: 424–435.  
1018 Durrant, C., H. Tayem, B. Yalcin, J. Cleak, L. Goodstadt, *et al.*,  
1019 2011 Collaborative Cross mice and their power to map host  
1020 susceptibility to *Aspergillus fumigatus* infection. *Genome re-*  
1021 *search* **21**: 1239–48.  
1022 Falke, K. C. and M. Frisch, 2011 Power and false-positive rate in  
1023 QTL detection with near-isogenic line libraries. *Heredity* **106**:  
1024 576–584.  
1025 Ferris, M. T., D. L. Aylor, D. Bottomly, A. C. Whitmore, L. D.  
1026 Aicher, *et al.*, 2013 Modeling Host Genetic Regulation of  
1027 Influenza Pathogenesis in the Collaborative Cross. *PLoS*  
1028 *Pathogens* **9**: e1003196.  
1029 Festing, M. F. W., 2010 Inbred strains should replace outbred  
1030 stocks in toxicology, safety testing, and drug development.  
1031 *Toxicologic Pathology* **38**: 681–690.  
1032 Flint, J. and T. F. Mackay, 2009 Genetic architecture of quanti-  
1033 tative traits in mice, flies, and humans. *Genome Research* **19**:  
1034 723–733.  
1035 Fu, C.-P., C. E. Welsh, F. P.-M. de Villena, and L. McMillan, 2012  
1036 Inferring ancestry in admixed populations using microarray  
1037 probe intensities. In *Proceedings of the ACM Conference on Bio-*  
1038 *informatics, Computational Biology and Biomedicine - BCB ’12*, pp.  
1039 105–112, New York, New York, USA, ACM Press.  
1040 Gatti, D. M., K. L. Svenson, A. Shabalina, L.-Y. Wu, W. Valdar,  
1041 *et al.*, 2014 Quantitative Trait Locus Mapping Methods for  
1042 Diversity Outbred Mice. *G3 (Bethesda, Md.)* **4**: 1623–1633.  
1043 Graham, J. B., J. L. Swarts, M. Mooney, G. Choonoo, S. Jeng,  
1044 *et al.*, 2017 Extensive Homeostatic T Cell Phenotypic Variation  
1045 within the Collaborative Cross. *Cell reports* **21**: 2313–2325.  
1046 Gralinski, L. E., M. T. Ferris, D. L. Aylor, A. C. Whitmore,  
1047 R. Green, *et al.*, 2015 Genome Wide Identification of SARS-  
1048 CoV Susceptibility Loci Using the Collaborative Cross. *PLoS*  
1049 *genetics* **11**: e1005504.  
1050 Haley, C. S. and S. A. Knott, 1992 A simple regression method for  
1051 mapping quantitative trait loci in line crosses using flanking

- 1052 markers. *Heredity* **69**: 315–24. 1114
- 1053 Kaeppler, S. M., 1997 Quantitative trait locus mapping using 1115
- 1054 sets of near-isogenic lines: Relative power comparisons and 1116
- 1055 technical considerations. *Theoretical and Applied Genetics* **95**: 1117
- 1056 384–392. 1118
- 1057 Kafkafi, N., J. Agassi, E. J. Chesler, J. C. Crabbe, W. E. Crusio, 1119
- 1058 *et al.*, 2018 Reproducibility and replicability of rodent pheno- 1120
- 1059 typing in preclinical studies. *Neuroscience and Biobehavioral* 1121
- 1060 *Reviews* **87**: 218–232. 1122
- 1061 Kafkafi, N., Y. Benjamini, A. Sakov, G. I. Elmer, and I. Golani, 1123
- 1062 2005 Genotype-environment interactions in mouse behavior: a 1124
- 1063 way out of the problem. *Proceedings of the National Academy* 1125
- 1064 *of Sciences of the United States of America* **102**: 4619–24. 1126
- 1065 Kang, H. M., J. H. Sul, S. K. Service, N. A. Zaitlen, S.-Y. Kong, 1127
- 1066 *et al.*, 2010 Variance component model to account for sample 1128
- 1067 structure in genome-wide association studies. *Nature genetics* 1129
- 1068 **42**: 348–354. 1130
- 1069 Kang, H. M., N. A. Zaitlen, C. M. Wade, A. Kirby, D. Heckerman, 1131
- 1070 *et al.*, 2008 Efficient control of population structure in model 1132
- 1071 organism association mapping. *Genetics* **178**: 1709–23. 1133
- 1072 Keele, G. R., J. W. Prokop, H. He, K. Holl, J. Littrell, *et al.*, 2018 1134
- 1073 Genetic Fine-Mapping and Identification of Candidate Genes 1135
- 1074 and Variants for Adiposity Traits in Outbred Rats. *Obesity* **26**: 1136
- 1075 213–222. 1137
- 1076 Kelada, S. N. P., 2016 Plethysmography Phenotype QTL in Mice 1138
- 1077 Before and After Allergen Sensitization and Challenge. *G3* 1139
- 1078 (Bethesda, Md.) **6**: 2857–2865. 1140
- 1079 Kelada, S. N. P., D. L. Aylor, B. C. E. Peck, J. F. Ryan, U. Tavares, 1141
- 1080 *et al.*, 2012 Genetic Analysis of Hematological Parameters in 1142
- 1081 Incipient Lines of the Collaborative Cross. *G3* (Bethesda, Md.) 1143
- 1082 **2**: 157–165. 1144
- 1083 King, E. G. and A. D. Long, 2017 The Beavis Effect in Next- 1145
- 1084 Generation Mapping Panels in *Drosophila melanogaster*. *G3* 1146
- 1085 **7**: 1643 LP – 1652. 1147
- 1086 King, E. G., S. J. Macdonald, and A. D. Long, 2012 Properties and 1148
- 1087 power of the *Drosophila* synthetic population resource for the 1149
- 1088 routine dissection of complex traits. *Genetics* **191**: 935–949. 1150
- 1089 Kislukhin, G., E. G. King, K. N. Walters, S. J. Macdonald, and 1151
- 1090 A. D. Long, 2013 The Genetic Architecture of Methotrexate 1152
- 1091 Toxicity Is Similar in *Drosophila melanogaster* and Humans. 1153
- 1092 *G3: Genes, Genomes, Genetics* **3**: 1301–1310. 1154
- 1093 Klasen, J. R., H. P. Piepho, and B. Stich, 2012 QTL detec- 1155
- 1094 tion power of multi-parental RIL populations in *Arabidopsis* 1156
- 1095 *thaliana*. *Heredity* **108**: 626–632. 1157
- 1096 Knapp, S. J. and W. C. Bridges, 1990 Using molecular markers 1158
- 1097 to estimate quantitative trait locus parameters: power and 1159
- 1098 genetic variances for unrepliated and replicated progeny. 1160
- 1099 *Genetics* **126**: 769–77. 1161
- 1100 Kover, P. X., W. Valdar, J. Trakalo, N. Scarcelli, I. M. Ehrenreich, 1162
- 1101 *et al.*, 2009 A Multiparent Advanced Generation Inter-Cross 1163
- 1102 to fine-map quantitative traits in *Arabidopsis thaliana*. *PLoS* 1164
- 1103 *genetics* **5**: e1000551. 1165
- 1104 Lander, E. S. and D. Botstein, 1989 Mapping mendelian factors 1166
- 1105 underlying quantitative traits using RFLP linkage maps. *Ge-* 1167
- 1106 *netics* **121**: 185–99. 1168
- 1107 Levy, R., R. F. Mott, F. A. Iraqi, and Y. Gabet, 2015 Collaborative 1169
- 1108 cross mice in a genetic association study reveal new candidate 1170
- 1109 genes for bone microarchitecture. *BMC Genomics* **16**: 1013. 1171
- 1110 Li, H., P. Bradbury, E. Ersoz, E. S. Buckler, and J. Wang, 2011 1172
- 1111 Joint QTL linkage mapping for multiple-cross mating design 1173
- 1112 sharing one common parent. *PloS one* **6**: e17573. 1174
- 1113 Lippert, C., J. Listgarten, Y. Liu, C. M. Kadie, R. I. Davidson, *et al.*, 1175
- 2011 FaST linear mixed models for genome-wide association 1176
- studies. *Nature Methods* **8**: 833–837. 1177
- Liu, E. Y., Q. Zhang, L. McMillan, F. P.-M. de Villena, and 1178
- W. Wang, 2010 Efficient genome ancestry inference in complex 1179
- pedigrees with inbreeding. *Bioinformatics* **26**: i199–i207. 1180
- Lorè, N. I., F. A. Iraqi, and A. Bragonzi, 2015 Host genetic di- 1181
- versity influences the severity of *Pseudomonas aeruginosa* 1182
- pneumonia in the Collaborative Cross mice. *BMC genetics* **16**: 1183
106. 1184
- Lynch, M. and B. Walsh, 1998 *Genetics and Analysis of Quantitative* 1185
- Traits*. Sinauer Associates, Sunderland, MA. 1186
- Mackay, T. F. C., S. Richards, E. A. Stone, A. Barbadilla, J. F. 1187
- Ayroles, *et al.*, 2012 The *Drosophila melanogaster* Genetic 1188
- Reference Panel. *Nature* **482**: 173–8. 1189
- Martínez, O. and R. N. Curnow, 1992 Estimating the locations 1190
- and the sizes of the effects of quantitative trait loci using 1191
- flanking markers. *Theor. Appl. Genet.* **85**: 480–488. 1192
- Mathes, W. F., D. L. Aylor, D. R. Miller, G. A. Churchill, E. J. 1193
- Chesler, *et al.*, 2011 Architecture of energy balance traits in 1194
- emerging lines of the Collaborative Cross. *American Journal* 1195
- of Physiology-Endocrinology and Metabolism* **300**: E1124– 1196
- E1134. 1197
- Molenhuis, R. T., H. Bruining, M. J. V. Brandt, P. E. van Soldt, H. J. 1198
- Abu-Toamih Atamni, *et al.*, 2018 Modeling the quantitative 1199
- nature of neurodevelopmental disorders using Collaborative 1200
- Cross mice. *Molecular Autism* **9**: 63. 1201
- Morgan, A. P., C.-P. Fu, C.-Y. Kao, C. E. Welsh, J. P. Didion, 1202
- et al.*, 2016 The Mouse Universal Genotyping Array: From 1203
- Substrains to Subspecies. *G3: Genes, Genomes, Genetics* **6**: 1204
- 263–279. 1205
- Mosedale, M., Y. Kim, W. J. Brock, S. E. Roth, T. Wiltshire, *et al.*, 1206
- 2017 Candidate Risk Factors and Mechanisms for Tolvaptan- 1207
- Induced Liver Injury Are Identified Using a Collaborative 1208
- Cross Approach. *Toxicological Sciences* **156**: kfw269. 1209
- Mott, R., C. J. Talbot, M. G. Turri, A. C. Collins, and J. Flint, 2000 1210
- A method for fine mapping quantitative trait loci in outbred 1211
- animal stocks. *PNAS* **97**: 12649–54. 1212
- Najarro, M. A., J. L. Hackett, B. R. Smith, C. A. Highfill, E. G. 1213
- King, *et al.*, 2015 Identifying Loci Contributing to Natural Vari- 1214
- ation in Xenobiotic Resistance in *Drosophila*. *PLoS Genetics* 1215
- 11**: 1–25. 1216
- Noble, L. M., I. Chelo, T. Guzella, B. Afonso, D. D. Ric- 1217
- cardi, *et al.*, 2017 Polygenicity and Epistasis Underlie Fitness- 1218
- Proximal Traits in the *Caenorhabditis elegans* Multiparental 1219
- Experimental Evolution (CeMEE) Panel. *Genetics* **207**: genet- 1220
- ics.300406.2017. 1221
- Orgel, K., J. M. Smeekens, P. Ye, L. Fotsch, R. Guo, *et al.*, 2019 1222
- Genetic diversity between mouse strains allows identification 1223
- of the CC027/GeniUnc strain as an orally reactive model of 1224
- peanut allergy. *The Journal of allergy and clinical immunology* 1225
- 143**: 1027–1037.e7. 1226
- Peirce, J. L., L. Lu, J. Gu, L. M. Silver, and R. W. Williams, 2004 1227
- A new set of BXD recombinant inbred lines from advanced 1228
- intercross populations in mice. *BMC genetics* **5**: 7. 1229
- Pfaff, B. and A. McNeil, 2018 *evir: Extreme Values in R*. R package 1230
- version 1.7-4. 1231
- Philip, V. M., G. Sokoloff, C. L. Ackert-Bicknell, M. Striz, 1232
- L. Branstetter, *et al.*, 2011 Genetic analysis in the Collaborative 1233
- Cross breeding population. *Genome Research* **21**: 1223–1238. 1234
- Phillippi, J., Y. Xie, D. R. Miller, T. A. Bell, Z. Zhang, *et al.*, 2014 1235
- Using the emerging Collaborative Cross to probe the immune 1236
- system. *Genes & Immunity* **15**: 38–46. 1237



- 1176 R Core Team, 2018 *R: A Language and Environment for Statistical* 1238  
1177 *Computing*. R Foundation for Statistical Computing, Vienna, 1239  
1178 Austria. 1240
- 1179 Ram, R., M. Mehta, L. Balmer, D. M. Gatti, and G. Morahan, 2014 1241  
1180 Rapid identification of major-effect genes using the collabora- 1242  
1181 tive cross. *Genetics* **198**: 75–86. 1243
- 1182 Rasmussen, A. L., A. Okumura, M. T. Ferris, R. Green, F. Feld- 1244  
1183 mann, *et al.*, 2014 Host genetic diversity enables Ebola hemor- 1245  
1184 rhagic fever pathogenesis and resistance. *Science (New York,* 1246  
1185 *N.Y.)* **346**: 987–91. 1247
- 1186 Rogala, A. R., A. P. Morgan, A. M. Christensen, T. J. Gooch, 1248  
1187 T. A. Bell, *et al.*, 2014 The Collaborative Cross as a resource for 1249  
1188 modeling human disease: CC011/Unc, a new mouse model 1250  
1189 for spontaneous colitis. *Mammalian genome* **25**: 95–108. 1251
- 1190 Rönnegård, L. and W. Valdar, 2011 Detecting major genetic loci 1252  
1191 controlling phenotypic variability in experimental crosses. 1253  
1192 *Genetics* **188**: 435–447. 1254
- 1193 Rutledge, H., D. L. Aylor, D. E. Carpenter, B. C. Peck, P. Chines, 1255  
1194 *et al.*, 2014 Genetic regulation of Zfp30, CXCL1, and neu- 1256  
1195 trophilic inflammation in murine lung. *Genetics* **198**: 735–745. 1257
- 1196 Shorter, J. R., F. Odet, D. L. Aylor, W. Pan, C.-Y. Kao, *et al.*, 2017 1258  
1197 Male Infertility Is Responsible for Nearly Half of the Extinction 1259  
1198 Observed in the Mouse Collaborative Cross. *Genetics* **206**: 1260  
1199 557–572. 1261
- 1200 Shusterman, A., Y. Salyma, A. Nashef, M. Soller, A. Wilensky, 1262  
1201 *et al.*, 2013 Genotype is an important determinant factor of 1263  
1202 host susceptibility to periodontitis in the Collaborative Cross 1264  
1203 and inbred mouse populations. *BMC genetics* **14**: 68. 1265
- 1204 Soller, M. and J. S. Beckmann, 1990 Marker-based mapping of 1266  
1205 quantitative trait loci using replicated progenies. *Theoretical* 1267  
1206 *and Applied Genetics* **80**: 205–208. 1268
- 1207 Srivastava, A., A. P. Morgan, M. L. Najarian, V. K. Sarsani, J. S. 1269  
1208 Sigmon, *et al.*, 2017 Genomes of the mouse Collaborative Cross. 1270  
1209 *Genetics* **206**: 537–556. 1271
- 1210 Svenson, K. L., D. M. Gatti, W. Valdar, C. E. Welsh, R. Cheng, 1272  
1211 *et al.*, 2012 High-resolution genetic mapping using the Mouse 1273  
1212 Diversity outbred population. *Genetics* **190**: 437–47. 1274
- 1213 Takuno, S., R. Terauchi, and H. Innan, 2012 The power of QTL 1275  
1214 mapping with RILs. *PloS one* **7**: e46545. 1276
- 1215 Threadgill, D. W. and G. A. Churchill, 2012 Ten Years of the 1277  
1216 Collaborative Cross. *Genetics* **190**: 291–294. 1278
- 1217 Threadgill, D. W., K. W. Hunter, and R. W. Williams, 2002 Genetic 1279  
1218 dissection of complex and quantitative traits: from fantasy to 1280  
1219 reality via a community effort. *Mammalian genome : official* 1281  
1220 *journal of the International Mammalian Genome Society* **13**: 1282  
1221 175–8. 1283
- 1222 Valdar, W., J. Flint, and R. Mott, 2006a Simulating the Collab- 1284  
1223 orative Cross: power of quantitative trait loci detection and 1285  
1224 mapping resolution in large sets of recombinant inbred strains 1286  
1225 of mice. *Genetics* **172**: 1783–97. 1287
- 1226 Valdar, W., L. C. Solberg, D. Gauguier, S. Burnett, P. Klenerman, 1288  
1227 *et al.*, 2006b Genome-wide genetic association of complex traits 1289  
1228 in heterogeneous stock mice. *Nature Genetics* **38**: 879–887. 1290
- 1229 Venables, W. N. and B. D. Ripley, 2002 *Modern Applied Statistics* 1291  
1230 *with S*. Springer, New York, fourth edition, ISBN 0-387-95457- 1292  
1231 0. 1293
- 1232 Venkatratnam, A., S. Furuya, O. Kosyik, A. Gold, W. Bodnar, 1294  
1233 *et al.*, 2017 Collaborative Cross Mouse Population Enables 1295  
1234 Refinements to Characterization of the Variability in Toxicoki- 1296  
1235 netics of Trichloroethylene and Provides Genetic Evidence 1297  
1236 for the Role of PPAR Pathway in Its Oxidative Metabolism. 1298  
1237 *Toxicological Sciences* **158**: 48–62. 1299
- Vered, K., C. Durrant, R. Mott, and F. A. Iraqi, 2014 Susceptibility 1300  
1301 to *Klebsiella pneumoniae* infection in collaborative cross mice 1302  
1303 is a complex trait controlled by at least three loci acting at 1304  
1305 different time points. *BMC genomics* **15**: 865. 1306
- Welsh, C. E., D. R. Miller, K. F. Manly, J. Wang, L. McMillan, *et al.*, 1307  
1308 2012 Status and access to the Collaborative Cross population. 1309  
1309 *Mammalian genome : official journal of the International* 1310  
1310 *Mammalian Genome Society* **23**: 706–12. 1311
- Xu, S., 2003 Theoretical basis of the Beavis effect. *Genetics* **165**: 1312  
1313 2259–68. 1314
- Yalcin, B., J. Flint, and R. Mott, 2005 Using progenitor strain in- 1315  
1316 formation to identify quantitative trait nucleotides in outbred 1317  
1317 mice. *Genetics* **171**: 673–81. 1318
- Yamamoto, E., H. Iwata, T. Tanabata, R. Mizobuchi, J.-i. Yone- 1319  
1320 maru, *et al.*, 2014 Effect of advanced intercrossing on genome 1320  
1321 structure and on the power to detect linked quantitative trait 1321  
1322 loci in a multi-parent population: a simulation study in rice. 1322  
1323 *BMC genetics* **15**: 50. 1324
- Yang, H., J. R. Wang, J. P. Didion, R. J. Buus, T. A. Bell, *et al.*, 2011 1325  
1326 Subspecific origin and haplotype diversity in the laboratory 1326  
1327 mouse. *Nature genetics* **43**: 648–55. 1328
- Yu, J., J. B. Holland, M. D. McMullen, and E. S. Buckler, 2008 1329  
1330 Genetic design and statistical power of nested association 1330  
1331 mapping in maize. *Genetics* **178**: 539–551. 1332
- Zhang, Z., W. Wang, and W. Valdar, 2014 Bayesian modeling 1333  
1334 of haplotype effects in multiparent populations. *Genetics* **198**: 1334  
1335 139–56. 1336
- Zheng, C., M. P. Boer, and F. A. van Eeuwijk, 2015 Reconstruc- 1337  
1338 tion of Genome Ancestry Blocks in Multiparental Populations. 1338  
1339 *Genetics* **200**: 1073–1087. 1340
- Zhou, X. and M. Stephens, 2012 Genome-wide efficient mixed- 1341  
1342 model analysis for association studies. *Nature genetics* **44**: 1342  
1343 821–4. 1344
- Zollner, S. and J. K. Pritchard, 2007 Overcoming the winner’s 1345  
1346 curse: estimating penetrance parameters from case-control 1346  
1347 data. *American journal of human genetics* **80**: 605–15. 1348
- Zou, F., Z. Xu, and T. Vision, 2006 Assessing the significance 1349  
1350 of quantitative trait loci in replicable mapping populations. 1350  
1351 *Genetics* **174**: 1063–8. 1352

## Appendix A: QR decomposition for fast regression

To maximize power to detect QTL while controlling the FPR, permutations to determine significance thresholds are needed, which is computationally expensive and thus the underlying regression functionality must be highly optimized. We accomplish this through the QR matrix decomposition, which we will describe briefly (Venables and Ripley 2002).

Let  $\mathbf{X} = \mathbf{PA}$  be the  $n \times m$  design matrix included in Eq 3, with  $m = 8$ . The solution for  $\beta$  from the least squares normal equations is  $\hat{\beta} = (\mathbf{X}^T \mathbf{X})^{-1} \mathbf{X}^T \mathbf{y}$ . Through the QR decomposition,  $\mathbf{X} = \mathbf{QR}$ , for which  $\mathbf{Q}$  is an  $n \times p$  orthonormal matrix ( $\mathbf{Q}^T \mathbf{Q} = \mathbf{I}$ ) and  $\mathbf{R}$  is a  $m \times m$  upper triangular matrix. With matrix algebra, it is fairly straightforward to show that  $\hat{\beta} = \mathbf{R}^{-1} \mathbf{Q}^T \mathbf{y}$ , which is also more numerically stable than calculating  $\hat{\beta}$  through  $(\mathbf{X}^T \mathbf{X})^{-1}$ . After solving for  $\hat{\beta}$ , the residual sums of squares, and ultimately  $\log P$ , can be rapidly calculated. Because our simulation approach involves regressing many permuted outcomes  $\mathbf{U}_p \mathbf{y}^{(s)}$ , where  $\mathbf{U}_p$  is a permutation matrix that re-orders  $\mathbf{y}^{(s)}$  randomly, on the same design matrices, computational efficiency can be vastly increased by pre-computing and saving the QR decompositions for all  $\mathbf{X}$ .

Once the QR decomposition has been stored for a design matrix  $\mathbf{X}_j$ ,  $j$  indexing locus, it is highly computationally efficient to conduct additional tests for any  $\mathbf{y}$ , thus encompassing all permuted outcomes  $\mathbf{U}_p \mathbf{y}$ . If  $\mathbf{X}_j$  is the same across  $S$  simulations, the boost in computation can extend beyond permutations to samples of  $\mathbf{y}^{(s)}$ , as is the case when the set of CC strains is fixed. In effect, two cases result for our R package SPARCC: when the set of CC strains is fixed, and when the set varies.

- Fixed set of CC strains

1. Store QR decompositions of  $\mathbf{X}_j$  for  $j = 1, 2, \dots, J$
2. Run genome scans for  $\mathbf{y}^{(s)}$  and  $\mathbf{U}_p \mathbf{y}^{(s)}$  for  $s = 1, 2, \dots, S$   $p = 1, 2, \dots, P$

- Varied set of CC strains

1. Store QR decompositions of  $\mathbf{X}_{js}$  for  $j = 1, 2, \dots, J$
2. Run genome scans for  $\mathbf{y}^{(s)}$  and  $\mathbf{U}_p \mathbf{y}^{(s)}$  for  $p = 1, 2, \dots, P$
3. Repeat steps 1 and 2 for  $s = 1, 2, \dots, S$

Varying the sets of CC strains increases computation time linearly with respect to  $S$ . If the investigators do not have a predefined set of strains, it is appropriate that this source of variability be incorporated into the power calculation.

## Appendix B: Computing environment and performance

We performed 1,000 simulations (in batches of 100) for each combination of the parameters, resulting in 8,400 individual jobs. These jobs were submitted in parallel to a distributed computing cluster (<http://its.unc.edu/rc-services/killdevil-cluster/>). Runtime varied depending on parameter settings and the hardware used, with the longest jobs taking approximately seven hours to complete.

## Appendix C: CC strains

This study used haplotype mosaic data available from <http://csbio.unc.edu/CCstatus/index.py?run=FounderProbs> for the following 72 CC strains: CC001, CC002, CC003, CC004, CC005, CC006,

CC007, CC008, CC009, CC010, CC011, CC012, CC013, CC014, CC015, CC016, CC017, CC018, CC019, CC020, CC021, CC022, CC023, CC024, CC025, CC026, CC027, CC028, CC029, CC030, CC031, CC032, CC033, CC034, CC035, CC036, CC037, CC038, CC039, CC040, CC041, CC042, CC043, CC044, CC045, CC046, CC047, CC048, CC049, CC050, CC051, CC052, CC053, CC054, CC055, CC056, CC057, CC058, CC059, CC060, CC061, CC062, CC063, CC065, CC068, CC070, CC071, CC072, CC073, CC074, CC075, CC076. This includes two strains CC051 and CC059 that are derived from the same breeding funnel and thus more closely related than typical pairs of CC strains.

Of the the 72 CC strains used here, 54 are among a larger set of 59 that are currently maintained and distributed by UNC (personal correspondence with Darla Miller, UNC). These 54/59 strains are CC001, CC002, CC003, CC004, CC005, CC006, CC007, CC008, CC009, CC010, CC011, CC012, CC013, CC015, CC016, CC017, CC019, CC021, CC023, CC024, CC025, CC026, CC027, CC029, CC030, CC031, CC032, CC033, CC035, CC036, CC037, CC038, CC039, CC040, CC041, CC042, CC043, CC044, CC045, CC046, CC049, CC051, CC053, CC055, CC057, CC058, CC059, CC060, CC061, CC062, CC065, CC068, CC071, CC072. The remaining 5/59 strains (CC078, CC079, CC080, CC081, CC083) lacked haplotype mosaic data at the time of simulation and so were not included (although note that their mosaics have since been added to the website).

1356 **Appendix D: Additive model and allelic series matrices**

1357 **Additive matrix**

$$\mathbf{A} = \begin{matrix} & \begin{matrix} A & B & C & D & E & F & G & H \end{matrix} \\ \begin{matrix} AA \\ BB \\ CC \\ DD \\ EE \\ FF \\ GG \\ HH \\ AB \\ AC \\ AD \\ AE \\ AF \\ AG \\ AH \\ BC \\ BD \\ BE \\ BF \\ BG \\ BH \\ CD \\ CE \\ CF \\ CG \\ CH \\ DE \\ DF \\ DG \\ DH \\ EF \\ EG \\ EH \\ FG \\ FH \\ GH \end{matrix} & \begin{bmatrix} 2 & 0 & 0 & 0 & 0 & 0 & 0 & 0 \\ 0 & 2 & 0 & 0 & 0 & 0 & 0 & 0 \\ 0 & 0 & 2 & 0 & 0 & 0 & 0 & 0 \\ 0 & 0 & 0 & 2 & 0 & 0 & 0 & 0 \\ 0 & 0 & 0 & 0 & 2 & 0 & 0 & 0 \\ 0 & 0 & 0 & 0 & 0 & 2 & 0 & 0 \\ 0 & 0 & 0 & 0 & 0 & 0 & 2 & 0 \\ 0 & 0 & 0 & 0 & 0 & 0 & 0 & 2 \\ 1 & 1 & 0 & 0 & 0 & 0 & 0 & 0 \\ 1 & 0 & 1 & 0 & 0 & 0 & 0 & 0 \\ 1 & 0 & 0 & 1 & 0 & 0 & 0 & 0 \\ 1 & 0 & 0 & 0 & 1 & 0 & 0 & 0 \\ 1 & 0 & 0 & 0 & 0 & 1 & 0 & 0 \\ 1 & 0 & 0 & 0 & 0 & 0 & 1 & 0 \\ 1 & 0 & 0 & 0 & 0 & 0 & 0 & 1 \\ 0 & 1 & 1 & 0 & 0 & 0 & 0 & 0 \\ 0 & 1 & 0 & 1 & 0 & 0 & 0 & 0 \\ 0 & 1 & 0 & 0 & 1 & 0 & 0 & 0 \\ 0 & 1 & 0 & 0 & 0 & 0 & 1 & 0 \\ 0 & 1 & 0 & 0 & 0 & 0 & 0 & 1 \\ 0 & 0 & 1 & 1 & 0 & 0 & 0 & 0 \\ 0 & 0 & 1 & 0 & 1 & 0 & 0 & 0 \\ 0 & 0 & 1 & 0 & 0 & 1 & 0 & 0 \\ 0 & 0 & 1 & 0 & 0 & 0 & 1 & 0 \\ 0 & 0 & 1 & 0 & 0 & 0 & 0 & 1 \\ 0 & 0 & 0 & 1 & 1 & 0 & 0 & 0 \\ 0 & 0 & 0 & 1 & 0 & 1 & 0 & 0 \\ 0 & 0 & 0 & 1 & 0 & 0 & 1 & 0 \\ 0 & 0 & 0 & 1 & 0 & 0 & 0 & 1 \\ 0 & 0 & 0 & 0 & 1 & 1 & 0 & 0 \\ 0 & 0 & 0 & 0 & 1 & 0 & 1 & 0 \\ 0 & 0 & 0 & 0 & 1 & 0 & 0 & 1 \\ 0 & 0 & 0 & 0 & 0 & 1 & 1 & 0 \\ 0 & 0 & 0 & 0 & 0 & 1 & 0 & 1 \\ 0 & 0 & 0 & 0 & 0 & 0 & 1 & 1 \end{bmatrix} \end{matrix}$$

1358 We can use matrices to specify simplifying linear combina-  
 1359 tions of the 36 diplotypes. The additive model matrix **A** is  
 1360 commonly used, and we use it here. Post-multiplication of the  
 1361 diplotype design matrix **D** with the **A** rotates the diplotypes at

1362 the locus to dosages of the founder haplotypes. If there is no  
 1363 uncertainty on the diplotype identities, **DA** will be the matrix of  
 1364 founder haplotype counts at the locus.

1365 **Allelic series matrices**

1366 We explore the influence of the allelic series on QTL mapping  
 1367 power through the simulation procedure. The QTL mapping pro-  
 1368 cedure estimates separate parameters for each founder, though  
 1369 in reality, there are likely fewer functional alleles. We denote  
 1370 the  $q^{\text{th}}$  functional allele as  $k_q$ . The allelic series can be sampled  
 1371 and encoded in the M.ID argument within the `sim.CC.data()`  
 1372 function of SPARCC. Below are examples of balanced (4v4) and  
 1373 unbalanced (7v1) bi-allelic series, as well as tri-allelic series.

1374 **Allelic series with eight alleles (maximum)**

1375 M.ID = "0,1,2,3,4,5,6,7"

$$\mathbf{M} = \mathbf{I} = \begin{matrix} & \begin{matrix} k_0 & k_1 & k_2 & k_3 & k_4 & k_5 & k_6 & k_7 \end{matrix} \\ \begin{matrix} A \\ B \\ C \\ D \\ E \\ F \\ G \\ H \end{matrix} & \begin{bmatrix} 1 & 0 & 0 & 0 & 0 & 0 & 0 & 0 \\ 0 & 1 & 0 & 0 & 0 & 0 & 0 & 0 \\ 0 & 0 & 1 & 0 & 0 & 0 & 0 & 0 \\ 0 & 0 & 0 & 1 & 0 & 0 & 0 & 0 \\ 0 & 0 & 0 & 0 & 1 & 0 & 0 & 0 \\ 0 & 0 & 0 & 0 & 0 & 1 & 0 & 0 \\ 0 & 0 & 0 & 0 & 0 & 0 & 1 & 0 \\ 0 & 0 & 0 & 0 & 0 & 0 & 0 & 1 \end{bmatrix} \end{matrix}$$

1376 **Example balanced (4v4) bi-allelic series**

1377 M.ID = "0,1,0,0,1,0,1,1"

$$\mathbf{M} = \begin{matrix} & \begin{matrix} k_0 & k_1 \end{matrix} \\ \begin{matrix} A \\ B \\ C \\ D \\ E \\ F \\ G \\ H \end{matrix} & \begin{bmatrix} 1 & 0 \\ 0 & 1 \\ 1 & 0 \\ 1 & 0 \\ 0 & 1 \\ 1 & 0 \\ 0 & 1 \\ 0 & 1 \end{bmatrix} \end{matrix}$$

1378 M.ID = "0,1,1,1,0,0,1,0"

$$\mathbf{M} = \begin{matrix} & \begin{matrix} k_0 & k_1 \end{matrix} \\ \begin{matrix} A \\ B \\ C \\ D \\ E \\ F \\ G \\ H \end{matrix} & \begin{bmatrix} 1 & 0 \\ 0 & 1 \\ 0 & 1 \\ 0 & 1 \\ 1 & 0 \\ 1 & 0 \\ 0 & 1 \\ 1 & 0 \end{bmatrix} \end{matrix}$$

1379 **Example unbalanced (7v1) bi-allelic series**

1380 M.ID = "0,0,0,0,0,1,0,0"

$$\mathbf{M} = \begin{matrix} & & k_0 & k_1 \\ \begin{matrix} A \\ B \\ C \\ D \\ E \\ F \\ G \\ H \end{matrix} & \begin{bmatrix} 1 & 0 \\ 1 & 0 \\ 1 & 0 \\ 1 & 0 \\ 1 & 0 \\ 0 & 1 \\ 1 & 0 \\ 1 & 0 \end{bmatrix} \end{matrix}$$

1381 M.ID = "0,1,0,0,0,0,0,0"

$$\mathbf{M} = \begin{matrix} & & k_0 & k_1 \\ \begin{matrix} A \\ B \\ C \\ D \\ E \\ F \\ G \\ H \end{matrix} & \begin{bmatrix} 1 & 0 \\ 0 & 1 \\ 1 & 0 \\ 1 & 0 \\ 1 & 0 \\ 1 & 0 \\ 1 & 0 \\ 1 & 0 \end{bmatrix} \end{matrix}$$

1382 **Example tri-allelic series**

1383 M.ID = "0,0,1,2,2,0,2,0"

$$\mathbf{M} = \begin{matrix} & & k_0 & k_1 & k_2 \\ \begin{matrix} A \\ B \\ C \\ D \\ E \\ F \\ G \\ H \end{matrix} & \begin{bmatrix} 1 & 0 & 0 \\ 1 & 0 & 0 \\ 0 & 1 & 0 \\ 0 & 0 & 1 \\ 0 & 0 & 1 \\ 1 & 0 & 0 \\ 0 & 0 & 1 \\ 1 & 0 & 0 \end{bmatrix} \end{matrix}$$

1384 M.ID = "0,1,0,0,0,0,2,2"

$$\mathbf{M} = \begin{matrix} & & k_0 & k_1 & k_2 \\ \begin{matrix} A \\ B \\ C \\ D \\ E \\ F \\ G \\ H \end{matrix} & \begin{bmatrix} 1 & 0 & 0 \\ 0 & 1 & 0 \\ 1 & 0 & 0 \\ 1 & 0 & 0 \\ 1 & 0 & 0 \\ 1 & 0 & 0 \\ 0 & 0 & 1 \\ 0 & 0 & 1 \end{bmatrix} \end{matrix}$$
